1 **Title**

2 An enriched network motif family regulates multistep cell fate transitions with restricted reversibility

3

4 **Authors**

5 Yujie Ye<sup>1</sup>, Jordan Bailey<sup>1</sup>, Chunhe Li<sup>2, 3\*</sup> and Tian Hong<sup>1, 4\*</sup>

6 1. Department of Biochemistry and Cellular and Molecular Biology, The University of Tennessee,

7 Knoxville, Tennessee, United States of America

8 2. Shanghai Center for Mathematical Sciences, Fudan University, Shanghai, China

9 3. Institute of Science and Technology for Brain-Inspired Intelligence, Fudan University, Shanghai, China

10 4. National Institute for Mathematical and Biological Synthesis, Knoxville, Tennessee, United States of  
11 America

12

13 \* Corresponding authors

14 E-mail: [chunheli@fudan.edu.cn](mailto:chunheli@fudan.edu.cn) (CL) [hongtian@utk.edu](mailto:hongtian@utk.edu) (TH)

15 **Abstract**

16 Multistep cell fate transitions with stepwise changes of transcriptional profiles are common to many  
17 developmental, regenerative and pathological processes. The multiple intermediate cell lineage states  
18 can serve as differentiation checkpoints or branching points for channeling cells to more than one  
19 lineages. However, mechanisms underlying these transitions remain elusive. Here, we explored gene  
20 regulatory circuits that can generate multiple intermediate cellular states with stepwise modulations of  
21 transcription factors. With unbiased searching in the network topology space, we found a motif family  
22 containing a large set of networks can give rise to four attractors with the stepwise regulations of  
23 transcription factors, which limit the reversibility of three consecutive steps of the lineage transition. We  
24 found that there is an enrichment of these motifs in a transcriptional network controlling the early T cell  
25 development, and a mathematical model based on this network recapitulates multistep transitions in  
26 the early T cell lineage commitment. By calculating the energy landscape and minimum action paths for  
27 the T cell model, we quantified the stochastic dynamics of the critical factors in response to the  
28 differentiation signal with fluctuations. These results are in good agreement with experimental  
29 observations and they suggest the stable characteristics of the intermediate states in the T cell  
30 differentiation. These dynamical features may help to direct the cells to correct lineages during  
31 development. Our findings provide general design principles for multistep cell lineage transitions and new  
32 insights into the early T cell development. The network motifs containing a large family of topologies can  
33 be useful for analyzing diverse biological systems with multistep transitions.

## 34 **Author summary**

35 The functions of cells are dynamically controlled in many biological processes including development,  
36 regeneration and disease progression. Cell fate transition, or the switch of cellular functions, often  
37 involves multiple steps. The intermediate stages of the transition provide the biological systems with the  
38 opportunities to regulate the transitions in a precise manner. These transitions are controlled by key  
39 regulatory genes of which the expression shows stepwise patterns, but how the interactions of these  
40 genes can determine the multistep processes were unclear. Here, we present a comprehensive analysis  
41 on the design principles of gene circuits that govern multistep cell fate transition. We found a large  
42 network family with common structural features that can generate systems with the ability to control  
43 three consecutive steps of the transition. We found that this type of networks is enriched in a gene  
44 circuit controlling the development of T lymphocyte, a crucial type of immune cells. We performed  
45 mathematical modeling using this gene circuit and we recapitulated the stepwise and irreversible loss of  
46 stem cell properties of the developing T lymphocytes. Our findings can be useful to analyze a wide range  
47 of gene regulatory networks controlling multistep cell fate transitions.

## 48 **Introduction**

49 Cell fate transition, including differentiation, de-differentiation and trans-differentiation, is a  
50 fundamental biological process in which the function of a cell gets specialized, reprogrammed or altered.  
51 The process often involves significant changes of multiple cellular properties, including the morphology,  
52 the self-renewal capacity and the potentials to commit to alternative lineages [1,2]. These changes are  
53 controlled by the dynamics of interacting transcription factors (TFs) and the modulation of chromatin  
54 structures, which in term are governed by complex regulatory networks in the cells [3-5]. Interestingly,  
55 the fate transitions in many systems are achieved by sequential commitments to a series of cellular  
56 states with stepwise changes in their transcriptional profile towards the final stage of the program  
57 (Figure 1) [6-11]. The intermediate states between the initial state (e.g. the undifferentiated state in the  
58 case of cell differentiation) and the final state may be important for multiple purposes, such as  
59 facilitating 'checkpoints' that ensure appropriate development of cellular behaviors, or allowing the cells  
60 to make correct decisions at the lineage branching points [11-15].

61 One example of these stepwise cell lineage transitions is the development of T lymphocytes in the  
62 thymus. The differentiation from multipotent pre-thymic progenitor cells to committed T cells involves  
63 multiple cellular states with stepwise changes of their cellular properties and the transcriptional profiles  
64 (Table 1) [16-19]. Several lines of evidence suggest that the transition states at an early phase of the  
65 differentiation can serve as stable checkpoints for sequential lineage commitments. The progress  
66 through these intermediate states is accompanied by stepwise loss of their potentials to differentiate  
67 into other cell types: pre-thymic progenitor cells can be converted to a few types of cells, including B  
68 cells, natural killer (NK) cells, dendritic cells (DCs) etc., whereas the multipotency of the intermediate cell  
69 types is more limited but not completely lost [20-26]. In addition, the stability of these intermediate  
70 states is substantial because the loss of differentiation signals does not result in de-differentiation of

71 some intermediate states [20], suggesting restricted reversibility (or complete irreversibility) of the  
72 multiple transitions. In addition, the lymphoid progenitor cells need to divide for a certain number of  
73 times at an intermediate state before committing to the T cell lineage, and the stable activities of the  
74 lineage defining transcriptional program at the intermediate stages may be important for the  
75 proliferations [27]. Finally, the loss of certain transcription factors (e.g. BCL11B) can lead to the  
76 termination of the differentiation at some intermediate states, which is often associated with diseases  
77 such as leukemia [18,20,28]. This further suggests that the intermediate states are cellular ‘attractors’  
78 between the initial and the final stages of the differentiation (Figure 1, bottom panel). Similar stable  
79 intermediate states during cell lineage transitions are observed in other systems, such as the epithelial-  
80 mesenchymal transition, and the skin development (Table 1), and those states also serve as regulatory  
81 stages for altering cellular properties including self-renewal and migration [10,29-37]. Therefore, the  
82 multiple intermediate states are involved in diverse normal development and pathological conditions.  
83 Understanding the regulatory programs for the sequential cell lineage commitments is a key step  
84 towards the elucidation of mechanisms underlying various biological processes involving multistep  
85 lineage transitions. Despite the accumulating data and observations on these stepwise lineage  
86 commitments, general mechanisms governing these differentiation processes with multiple  
87 intermediate cellular states remain unclear.

88

89 **Figure 1. Illustration of multistep cell fate transition. A.** transition from one cellular state to another  
90 via two intermediate states. Dashed arrow indicates the limited reversibility of each transition. **B.**  
91 stepwise changes of the levels of two transcription factors during the multistep transitions involving four  
92 states. **C.** metaphoric energy landscape depicting the four-attractor system. Colors for cell states and  
93 transition arrows in B and C match those in the illustration in A.

94

95 **Table 1. Examples of multistep transitions with restricted reversibility**

| Physiological scenario            | Cellular phenotypic transition                                                  | Key regulators with stepwise modulations   | Extracellular signals | Evidence supporting multistep transitions, multiple intermediate states and restricted reversibility |
|-----------------------------------|---------------------------------------------------------------------------------|--------------------------------------------|-----------------------|------------------------------------------------------------------------------------------------------|
| Early T cell development          | ETP/DN1 → DN2a → DN2b → DN3                                                     | PU.1 TCF-1<br>GATA3<br>BCL11B <sup>b</sup> | Notch                 | [17-20,28]                                                                                           |
| Skin development                  | Stem cell → renewable spinous cell → non-renewable spinous cell → granular cell | OVOL1 OVOL2                                | Calcium ion           | [32,33,37]                                                                                           |
| Epithelial-mesenchymal transition | E → <sup>a</sup> EM1 → <sup>a</sup> EM2 → <sup>a</sup> M                        | SNAIL1 TWIST<br>ZEB1 miR200                | TGF-β                 | [29-31,34-36]                                                                                        |

96

97 <sup>a</sup> Reversal transitions were observed, but they occur in a limited subpopulation.

98 <sup>b</sup> Unlike other factors, BCL11B exhibits an abrupt change at the second transition.

99

100 In this study, we explored the strategies in terms of the transcriptional network design that gives rise to  
101 stepwise transitions during cell differentiation. We first used a generic form of networks containing  
102 three interacting TFs to find network motifs that can produce four attractors (the minimum number of  
103 attractors in the examples of T cell development, epithelial-mesenchymal transition and skin  
104 development) with stepwise changes of transcriptional factor levels. We found two types of network  
105 motifs, both involving interconnections of positive feedback loops, which can generate the four-  
106 attractor systems. These motifs constitute a large family of gene regulatory networks. We found that  
107 there is an enrichment of these motifs in a network controlling the early T cell development. We built a

108 specific model using known interactions among key transcription factors in developing T cells, and the  
109 model shows that the transcriptional network governs multistep and irreversible transitions in the  
110 development process.

111 To investigate the stochastic dynamics for early T cell development model, we mapped out the quasi-  
112 energy landscape for the early T cell development. This landscape characterizes the four attractors  
113 representing four stages of early T cell development quantitatively. In addition, by calculating the  
114 minimum action paths (MAPs) between different attractors, we quantified the dynamics of the key  
115 factors in response to Notch signal with fluctuations, which are in good agreement with experimental  
116 observations. Finally, we identified the critical factors influencing T cell development by global sensitivity  
117 analysis based on the landscape topography. Overall, our model for early T cell development elucidates  
118 the mechanisms underlying the stepwise loss of multipotency and multiple stable checkpoints at various  
119 stages of differentiation. The network topologies for multiple attractors found in this study and our  
120 motif discovery strategy combined with the landscape methodology can be useful for analyzing a wide  
121 range of cell differentiation systems with multiple intermediate states.

122

## 123 **Results**

### 124 **Networks in a large motif family govern systems with four attractors with stepwise transcriptional** 125 **modulation**

126 To find transcriptional network topologies that can generate multiple intermediate states during cell  
127 fate transition, we first performed random parameter sampling with a network family containing up to 3  
128 nodes (Figure 2A). In this framework of network topology, each node represents a transcription factor  
129 (TF) that can potentially influence the transcription levels of other two TFs and itself. Topology searching

130 with a 3-node network was used for motif discovery for various performance objectives in previous  
131 studies [38,39]. We performed exhaustive search for topologies with up to 6 regulations from a total of  
132 9 regulations of the network family, and constructed a mathematical model for each topology (see  
133 Methods for details). For each model, we performed random sampling of the parameter space from  
134 uniformly distributed values (Table S1). and we selected topologies containing at least one parameter  
135 set that is able to generate four attractors with stepwise changes of transcriptional levels. We define the  
136 system with four attractors with the stepwise changes of transcriptional levels as the scenario in which  
137 there are four stable steady states and they can be consistently ordered by the concentrations of any  
138 pairs of TFs. In other words, one TF always monotonically increases or decreases with another TF in  
139 these four states. Among the 2114 network topologies that we searched, we found 216 topologies that  
140 can produce such behavior. In addition, we found 417 topologies that can only produce four unordered  
141 steady states (TF concentrations are non-monotonically correlated among the states) (Figure S11).

142 To visualize the relationships among these topologies, we constructed a complexity atlas (Figure 2B), in  
143 which the nodes represent the network structures that gave rise to four attractors, and the edges  
144 connect pairs of topologies that differ by a single regulation (addition or removal of a transcriptional  
145 interaction) [40]. We define the minimum topologies as those of which the reduction of complexity, or  
146 the removal of any regulation from the network, will abolish its capability to generate four attractors  
147 (solid nodes in Figure 2B and examples in Figure 2C). We found 29 such minimum topologies which  
148 represent the non-redundant structures for producing the four-attractor system.

149 Interestingly, all of the 216 topologies obtained from our search contain three distinct positive feedback  
150 loops (including double-negative feedback loops), and they can be categorized into two types of motifs  
151 (Figure 2B, bottom panel). The Type I motif contains three positive feedback loops that are closed at a  
152 single TF (red nodes and edges in Figure 2B). The Type II motif contains three connected positive



153 feedback loops, two of which do not share any TF but are connected via the third loop (blue nodes and  
154 edges in Figure 2B). There is a remarkable diversity of each of the motif types because the  
155 interconnected positive feedback loops can share multiple TFs (Figures S1 and S2). Based on the  
156 complexity atlas (Figure 2B), we found that Type II motifs contain 4-6 regulations, and Type I motifs  
157 contain 5-6 regulations. Some of the networks with 6 regulations contain subnetworks of both Type I  
158 and Type II motifs (Hybrid type, green nodes). The four attractors in the space of two TFs exhibit a  
159 variety of patterns of nonlinear monotonic correlations (Figure 2C, Figure S3), which are governed by  
160 intersections of highly nonlinear nullclines in the state space containing the two TFs (Figure 2D, Figures  
161 S1 and S2). The definitions of various types of motifs are listed in Table 2, and the statistics of the  
162 topologies discovered are summarized in Table 3 (also see Figure S11 for an illustration). Overall, this  
163 motif family represents a large number of networks that can produce a common type of behaviors:  
164 multiple stable intermediate states in terms the transcriptional activity.

165

166 **Figure 2. Network motifs governing four-attractor systems. A.** Illustration of the network topology  
167 searching. Dashed arrows are regulations sampled. The topologies were screened by the criterion of the  
168 four attractors with stepwise changes of TFs. **B.** Complexity atlas for selected topologies. Closed circles  
169 denote minimum motifs. Open circles denote topologies containing more regulations than those in the  
170 minimum motifs. Each arrow denotes the difference by one regulation in the network. Examples of  
171 minimum motifs are shown at the bottom. Red: Type I motif. Blue: Type II motif. Green: Hybrid motif. **C.**  
172 Overlaid four attractors for each of the 29 minimum topologies. Factor A denotes the TF on the left of  
173 the network diagram. Factor B denotes the TF on the right of the network diagram. In some topologies A  
174 and B and positively correlated (left panel), whereas they are negatively correlated in other topologies  
175 (right panel). Colored dots denote the stable steady states. Colored lines connect states of their

176 corresponding topologies. The colors of the cell states match the illustration in Figure 1. The colors of  
177 the lines denote different representative models. z-score is calculated by shifting the mean of each four  
178 attractors to 0 and then normalizing the four data points to unit variance data. **D.** Example phase planes  
179 for two minimum topologies (Type I and Type II respectively). In each case, four out of the seven steady  
180 states (intersections denoted by solid dots) are stable. Network structures and phase planes for all 29  
181 minimum motifs are included in Figures S1 and S2. All models shown in this figure are built with additive  
182 form of Hill functions.

183 **Table 2. Definitions and key features of network motifs that generate systems with four ordered**  
184 **attractors.**

|                | Definition                                                                                                     | Minimum number of regulations | Minimum number of positive feedback loops |
|----------------|----------------------------------------------------------------------------------------------------------------|-------------------------------|-------------------------------------------|
| Type I motifs  | Three positive feedback loops that share one or more TFs among all of them.                                    | 5                             | 3                                         |
| Type II motifs | Three connected positive feedback loops. Two of them do not share any TF but are connected via the third loop. | 4                             | 3                                         |
| Hybrid motifs  | Motifs containing both Type I and Type II motifs.                                                              | 6                             | 4                                         |

185  
186 In summary, we found two types of network motifs that generate four attractors with stepwise changes  
187 of the transcriptional profile. Two of these attractors represent the multiple intermediate states  
188 observed in various biological systems. This exploratory analysis elicits several interesting questions:  
189 what are the biological examples of such network motifs? Can the conclusions with respect to the two  
190 types of motifs be generalized to networks with more than three TFs? Is there any advantage of  
191 combining both types of motifs? How are the transitions among these states triggered deterministically  
192 and stochastically? To provide insights into these questions in a more biologically meaningful context,

193 we will use a specific biological system to describe more detailed analysis of these motifs and their  
194 underlying gene regulatory networks in the following sections.

195

196 **Type I and Type II network motifs are enriched in a transcriptional network controlling early T cell**  
197 **development**

198 We asked whether the motifs that we discovered can be found in any known transcriptional network  
199 that potentially control multistep cell differentiation. We used the early T cell differentiation in the  
200 thymus as an example to address this question. The differentiation from multipotent lymphoid  
201 progenitor cells to unipotent early T cells involves multiple stages at which the cells possess varying  
202 potentials to commit to non-T lineages and other cellular properties such as proliferation rates. At the  
203 early phase of this process, four stages of development T cells (ETP/DN1, DN2a, DN2b, DN3) were  
204 identified experimentally, and the progression through these stages is controlled by a myriad of  
205 transcription factors including four core factors, TCF-1, PU.1, GATA3 and BCL11B. These TFs form a  
206 complex network among themselves (see Figure 3A and supporting experimental observations in Table  
207 S3), and the stepwise changes in the levels of these TFs were observed in the four developmental stages  
208 of T cells [20,28]. The interactions involving these core TFs were shown to be critical for the irreversible  
209 commitment to the T cell lineage by forming a bistable switch [41]. Among these factors, PU.1 level  
210 decreases as the cells commit to later stages, whereas the levels of other three factors increase in this  
211 process. It is unclear, however, whether this transcriptional network can serve as a regulatory unit that  
212 governs the multistep nature of the T cell differentiation.

213 We noticed that this T cell transcriptional network contains the motifs that we found in our analysis  
214 using the generic form of networks, we therefore hypothesized that the models based on this network  
215 can have four attractors with sequential changes of the four TFs. Indeed, using random sampling we

216 were able to find parameter sets that give rise to four-attractor systems similar to what we obtained  
217 with the generic 3-node framework. To find the functional components that generate this behavior, we  
218 analyzed the subnetworks of the complex T cell regulatory network [42]. We removed the regulations  
219 from the network systematically, and we found that out of the non-redundant 1553 topologies (2047  
220 subnetworks), there are 568 topologies (701 subnetworks) that can generate four attractors with  
221 stepwise changes of the TFs (Figure 3B). We used a complexity atlas to visualize the relationships among  
222 these subnetworks (Figure 3C). We found that the network can be reduced to one of the 66 minimum  
223 topologies (97 minimum subnetworks) which retains the four-attractor property (solid nodes in Figure  
224 3C). Notably, these networks can be classified into the two types of motifs described earlier (Figure 2B).  
225 Similar to the networks that we obtained through the generic framework, the two types of minimum  
226 motif have 4-6 regulations. Subnetworks with both types of motifs (green nodes and edges) start to  
227 appear when the number of regulations reaches six. The numbers of motifs and subnetworks obtained  
228 for the generic framework and the T cell model are summarized in Table 3.

229

230 **Figure 3. Four-attractor motifs in the early T cell transcriptional network.** **A.** Influence diagram for  
231 transcriptional regulations among four core factors controlling the early T cell development. **B.**  
232 Functional subnetworks of the T cell network were systematically obtained by removing regulations  
233 from the network. These subnetworks were screened by the criterion that four attractors with stepwise  
234 changes of TFs exist in the absence of Notch signal. **C.** Complexity atlas showing the relationships of the  
235 two four-attractor motifs in the subnetworks of the T cell model. Top callout shows the full network in  
236 the absence of Notch. Bottom callouts show examples of the minimum functional subnetworks of the  
237 two types with particular numbers of regulations. Red: Type I motif. Blue: Type II motif. Green: Hybrid  
238 motif. **D.** Overlaid four attractors for each of the 66 minimum topologies. Colored dots denote the

239 stable steady states. Colored lines connect states of their corresponding topologies. All models shown in  
240 this figure are built with the multiplicative form of Hill functions.

241

242 **Table 3. Numbers of sampled network structures and discovered motifs <sup>a</sup>**

|                        | 3-node networks | T cell model |
|------------------------|-----------------|--------------|
| Total networks sampled | 2114 (12258)    | 1553 (2047)  |
| Type I motifs          | 77 (448)        | 191 (286)    |
| Type II motifs         | 115 (638)       | 108 (120)    |
| Hybrid motifs          | 24 (144)        | 269 (295)    |
| Minimum Type I motifs  | 15 (84)         | 44 (71)      |
| Minimum Type II motifs | 14 (78)         | 22 (26)      |

243

244 <sup>a</sup>In each cell of the table, the first number is the number of non-redundant network topologies. The  
245 number in the parentheses is the number of networks (or sub-networks of the T cell model) including  
246 the isometric topologies.

247

248 We next quantified the enrichment of the two motif families in the early T cell transcription network.

249 We first generated random networks by perturbing the existing regulations in the network model and

250 computed the empirical p-values for observing the numbers of different types of network motifs. The T

251 cell network contains a large number of positive feedback loops and the two types of motifs that we

252 described earlier (Figure 4, top panel). As expected, the network is significantly enriched with positive

253 feedback loops in general (Figure 4, middle panel, red bars). However, the enrichments of Type I motifs

254 and the combinations of Type I and Type II motifs are even more significant than that of the single  
255 positive feedback loops (Figure 4, middle panel, red bars). To exclude the possibility that this differential  
256 significance was observed due to the way we generate random networks which gives low p-values ( $<10^{-4}$ )  
257 in general, we used another method to generate random networks with an augmented number of  
258 regulations (Figure 4, middle panel, blue bars). Each pair of TFs were assigned with a pair of random  
259 regulations (positive, negative or none). Consistent with the previous method, the T cell transcriptional  
260 network is enriched with positive feedback loops overall, but the enrichment is more significant for Type  
261 I motifs or for the combination of Type I and Type II motifs. Interestingly, motifs that are similar to Type I  
262 motif but have higher complexity (more positive feedback loops) does not show more significant  
263 enrichment than Type I motif does (Figure S12). These results suggest the possibility that the network  
264 has been evolved to reach more complex performance objectives than those enabled by simple positive  
265 feedback loops alone.

266

267 **Figure 4. Enrichment of Type I and Type II motifs in the T cell model.** Top panel: total occurrences of  
268 various types of motifs in the T cell network. Middle panel: empirical p-values of the single positive  
269 feedback loops and the sum of the two types of motifs. Bottom panel: an illustration of the p-values  
270 with the distributions of background population. Random networks were obtained by 1) permuting the  
271 regulations in the existing network by randomly assigning their sources and targets (red) and 2)  
272 assigning random regulations (positive, negative or none) between each pair of TFs (blue).  $10^5$  random  
273 networks were generated with each method. Empirical p-values were obtained by counting the number  
274 of the random networks with the number of motifs not less than those in the T cell network. See  
275 Methods for details of the p-value definition. Distributions of motif frequencies obtained from the  
276 random networks using the second method are shown in the bottom panel. The yellow vertical bars

277 represent the number of occurrences in the T cell network. The right-tail areas defined by the vertical  
278 bars correspond to the p-values shown in the middle panel (blue bars).

279

280 Since the minimum motifs alone can generate the four-attractor system, we asked whether the  
281 combination of these motifs enhances the ability of the network to produce the system. We therefore  
282 compared a subnetwork containing only one minimum Type I motif with another one containing  
283 multiple such motifs in terms of the performance to generate a particular four-attractor system (Figure  
284 5A. See Methods and Text S1 for details). We found that the subnetwork with multiple Type I motifs  
285 outperforms the one with only one motif (Figure 5B and C, the purple curve for production rate has a  
286 more robust pattern showing 7 intersections with the degradation curve than the red production curve  
287 does), suggesting the advantage of combining multiple motifs with similar functions to enhance its  
288 overall performance. We next asked whether the topologies that contain both Type I and Type II motifs  
289 have greater probabilities to generate the four-attractor system than the topologies with one type of  
290 motifs do. When we explored the parameter space randomly for each topology with a fixed number of  
291 samples, a larger number of parameter sets that can generate the four-attractor system were found  
292 with the topologies containing both motifs than with those containing either Type I or Type II motifs  
293 only (Figure S5 and Figure 5D). This suggests that the combination of both motifs might be a robust  
294 strategy to generate the four-attractor system. This pattern was observed for all the topologies in the  
295 complexity atlas (Figure S6) as well as those with the same degree of complexity (Figure 5D, networks  
296 with 7 regulations were chosen because they have comparable fractions of the three types of motifs).

297

298 **Figure 5. Comparisons of motifs with different complexity and types. A.** Two specific network  
299 topologies were selected for comparing models with different complexity. Network 1 contains multiple

300 Type I motifs, whereas Network 2 is a single Type I motif. The color code of the complexity atlas is the  
301 same as that in Figure 2 and Figure 3. Red: Type I motif. Blue: Type II motif. Green: Hybrid motif. **B.**  
302 Performances of the two subnetworks are compared. Performance was quantified with the sum of  
303 squared distance (SSD) from a predefined continuous production function (gray curve) of PU.1 level that  
304 generate four attractors (see details in supplementary text). Purple and red curves represent the  
305 optimized functions fitted to the gray curve. **C.** SSD values obtained from 500 optimization runs. Each  
306 value was calculated using the procedure shown in B. **D.** Histogram for the numbers of topologies with  
307 7 regulations with respect to the number of parameter sets that generate the four-attractor systems  
308 per  $10^6$  random parameter sets.

309

310 In summary, we found that the core transcriptional network controlling early T cell differentiation are  
311 enriched with Type I and Type II network motifs. The network composed of these two types of motifs  
312 governs a dynamical system containing four attractors, corresponding to four known stages in the early  
313 T cell development. The networks with both types of motifs and greater number of such motifs have  
314 more robust capability of generating the four-attractor systems than those networks with fewer types of  
315 numbers of motifs do.

316

317 **Stepwise transitions with restricted reversibility provide robustness to fluctuating differentiation**  
318 **signal to multiple intermediate states**

319 We next characterized the dynamical features of the four-attractor system of the T cell development  
320 model in response to differentiation signals. For this and subsequent analysis, we focused on a model  
321 describing the network topology shown in Figure 3A (the full model). We first performed bifurcation  
322 analysis of the system to the changes of Notch signaling (Figure 6A). With the increasing Notch signal,



323 the system undergoes three saddle-node bifurcations, at which the stability of the proceeding cellular  
324 states is lost (Figure 6A, black arrows). These bifurcation points therefore represent the cell state  
325 transitions from one stage to the next. The structure of the bifurcation diagram shows a remarkable  
326 robust multistep commitment program governed by the T cell transcription network: the commitment  
327 to each stage of the program has restricted reversibility in that the attenuation or withdrawal of the  
328 Notch signaling does not result in de-differentiation of the developing T cells (i.e. the return of the  
329 transcription profile to earlier stages that may have greater multipotency). It was previously shown that  
330 the commitment from DN2a to DN2b is an irreversible process with respect to Notch signaling, and this  
331 transition eliminates developing T cells' potential to be diverted to any other lineages when Notch  
332 signaling is abolished [20,41]. However, simple toggle-switch models do not explain the observation that  
333 the multipotency of the early T cells is lost in a stepwise manner. For example, cells at ETP can be  
334 differentiated into B cells, macrophages, dendritic cells (DCs), granulocytes, natural killer (NK) cells and  
335 Innate lymphoid cellsubset2 (ILC2), whereas the potentials to commit to many of the lineages are  
336 blocked even in the absence of Notch signaling at the DN2a stage, at which the cells can only be  
337 differentiated into NK cells and ILC2 [20]. Therefore, the stepwise, irreversible transcriptional transitions  
338 revealed by our model is consistent with the experimental observations with respect to the loss of  
339 multipotency in the stepwise manner.

340 Although the absence of Notch signal does not allow the reversal of lineage progression, it was  
341 previously shown that the absence of BCL11B in lymphoid progenitor cells blocks its ability to progress  
342 to DN2b stage, whereas the Cre-controlled knockout of BCL11B in committed T cells (e.g. DN3 cells)  
343 reverts its transcriptional profile to DN2a-like cells [28]. Upon blocking the production of BCL11B in our  
344 model, we observed the loss of attractors of DN2b and DN3, and the DN2a state is the only stable stage  
345 even in the presence of the strong Notch signaling (Figure 6B). As a result, increasing Notch signaling  
346 only triggers one saddle-node bifurcation, representing the transition from ETP to DN2a cell (Figure 6B,

347 top panel and black arrow), whereas the decrease of the BCL11B production triggers the transition back  
348 to DN2a instead of ETP (Figure 6C). These results are in agreement with the previous experimental  
349 findings [28], and they further support the importance of the multistep differentiation system revealed  
350 by our model.

351

352 **Figure 6. Stability analysis of the T cell model.** The full model shown in Figure 3A is used for all the  
353 analysis. **A.** Bifurcation diagrams for the steady states of the four core factors with respect to the Notch  
354 signal. Solid curve: stable steady state. Dashed curve: unstable steady state. **B.** Bifurcation diagram  
355 under *Bcl11b* knockout condition with respect to Notch signal. Solid curve: stable steady state. Dashed  
356 curve: unstable steady state. **C.** Bifurcation diagram with respect to BCL11B production rate parameter.  
357 Solid curve: stable steady state. Dashed curve: unstable steady state. **D.** Illustration of the observed  
358 transitions among the four states. Colors of the stable branches of the bifurcation diagrams and the cell  
359 icons are matched to the cellular states shown in Figure 1.

360

361 The bifurcation analysis shows how the lineage progression is influenced by stably increasing or  
362 decreasing Notch signal strengths. We next asked how the duration of Notch signal may control the  
363 multistep lineage transition. By inducing the differentiation with varying durations of the Notch signaling,  
364 we found that cells experiencing transient Notch signals may only commit to intermediate stages of  
365 differentiation (Figure 7A). In addition, the system is able to integrate the information of the signal  
366 intensity and duration to make decision on the lineage progression. These results suggest that the  
367 multistep lineage transition can be triggered by the increasing strength of the signal, the increasing  
368 duration of the signal, or the combination of both types of signal dynamics. Earlier experimental studies  
369 have shown that transient Notch signaling can irreversibly drive the cells to an intermediate, but

370 committed stage with a definitive T cell identity (DN2b) [28,41,43]. This is in agreement with our results,  
371 and our model further suggests that the commitment to other intermediate states is also irreversible  
372 with respect to the lineage progression (note that this irreversibility does not refer to the establishment  
373 of T cell identity).

374 One possible advantage of the multi-stable system is its robustness of response in facing fluctuating  
375 signals. We therefore performed numerical simulations of the dynamical system under increasing Notch  
376 signaling with significant fluctuations. Under this condition, transient reduction of Notch signaling halted  
377 the progress of the lineage commitment but did not trigger the de-differentiation (Figure 7B). Our model  
378 suggests that the design of transcriptional network allows system to stop at intermediate stages before  
379 proceeding to the next ones. This strategy has several potential physiological benefits: 1) it protects the  
380 cell lineage progression against sporadic fluctuations of Notch signaling; 2) it facilitates the ‘checkpoints’  
381 before lineage commitment in the middle of the entire developmental process and 3) it allows the  
382 stable storage of differentiation intermediates which can be differentiated into mature T cells rapidly  
383 when there is an urgent need of new T cells with a diverse T cell receptor repertoire.

384

385 **Figure 7. Multistep lineage transitions under the influence of varying dynamics Notch signals. A.**  
386 Strength and duration of the Notch signal were varied in each simulation. 200X200 combinations of  
387 different signal strengths and durations were tested, and the final cellular phenotypes were determined  
388 using the levels of the four core factors. **B.** Dynamics of PU.1 in response to increasing Notch with  
389 significant fluctuations. The mean of the Notch signal increases linearly in the first phase, then it is  
390 attenuated in the second phase. Fluctuations were simulated with additive noise in small time intervals.

391

392 **Quantitative analysis of the energy landscapes and minimum action paths delineates the patterns of**  
393 **the multiple-attractor system in T cell differentiation**

394 With the deterministic modeling and bifurcation approaches, we described the local stability for multi-  
395 stable T cell model. However, the global stability is less clear from the bifurcation analysis alone. In  
396 addition, it is important to consider the stochastic dynamics for T cell development model, because the  
397 intracellular noise may play crucial roles in cellular behaviors [44,45] . The Waddington landscape has  
398 been proposed as a metaphor to explain the development and differentiation of cells [46]. Recently, the  
399 Waddington epigenetic landscape for the biological networks has been quantified and employed to  
400 investigate the stochastic dynamics of stem cell development and cancer [47-51].

401 Following a self-consistent approximation approach (see Methods), we calculated the steady state  
402 probability distribution and then obtained the energy landscape for the model of the early T cell  
403 development. For visualization, we selected two TFs (PU.1 and TCF-1) as the coordinates and projected  
404 the 4-dimensional landscape into a two-dimensional space, by integrating the other 2 TF variables. Here  
405 TCF-1 is a representative T cell lineage TF, and PU.1 is a TF for alternative cell fates. Note that our major  
406 conclusions do not depend on the specific choice of the coordinate (see Figures S7 and S8 for landscapes  
407 with PU.1/BCL11B and PU.1/GATA3 as the coordinates).

408 In the case without Notch signal ( $N = 0$ ), four stable cell states emerge on the landscape for the T cell  
409 developmental system (Figure 8). On the landscape surface, the blue region represents lower potential  
410 or higher probability, and the yellow region represents higher potential or lower probability. The four  
411 basins of attraction on the landscape represent four different cell states characterized by different TF  
412 expression patterns in the 4-dimensional state space. These states separately correspond to ETP/DN1  
413 (high PU.1/low TCF-1/low BCL11B/low GATA3 expression), DN3 state (low PU.1/high TCF-1/high  
414 BCL11B/high GATA3 expression), and two intermediate states (DN2a and DN2b, intermediate expression

415 for the four TFs). The existence of four stable attractors is consistent with experiments [16-19]. As the  
416 Notch signal ( $N$ ) increases, the landscape change from a quadristable (four stable states coexist), to a  
417 tristable (DN2a, DN2b and DN3), to a bistable (DN2b and DN3) and finally to a monostable DN3 state  
418 (Figure S9). These results provide a straightforward explanation for the irreversibility observed in  
419 experiments for the stepwise T cell lineage commitment.

420 To examine the transitions among individual cell types, we calculated kinetic transition paths by  
421 minimizing the transition actions between attractors [52,53], obtaining minimum action paths (MAPs).  
422 The MAPs for different transitions are indicated on the landscape (Figure 8). The white MAPs from the  
423 ETP state to the DN3 state, correspond to the T cell developmental process while the magenta MAPs  
424 from the DN3 state to the ETP state, correspond to reprogramming process. The lines represent the  
425 MAPs, and the arrows denote the directions of the transitions. The MAP for T cell developmental  
426 process and the MAP for the backward process are irreversible, since the forward and reverse kinetic  
427 paths are not identical. This irreversibility of kinetic transition paths is caused by the non-gradient force,  
428 i.e. the curl flux [54,55]. Here, the solid white lines represent three stepwise transitions from ETP to  
429 DN2a, DN2a to DN2b, and DN2b to DN3, whereas the dashed white line represents the direct transition  
430 paths from ETP to DN3. From the MAPs for T cell development, we found that the direct transition path  
431 is very similar to the stepwise transition path (the white solid line is similar to the white dashed line,  
432 Figure 7, Figures S7 and S8), which indicates that the T cell developmental process needs to go through  
433 the two intermediate states (DN2a and DN2b). This confirms the critical roles of the intermediate states  
434 for the T cell differentiation. It is worth noting that the MAPs here quantify the most probable transition  
435 paths, which suggest the optimal path (with least transition actions) for cells to switch from one state to  
436 another. However, in a realistic gene regulatory system, usually a signal is needed to induce cell state  
437 transitions (e.g. the Notch signaling is used here to induce T cell development).

438

439 **Figure 8. Energy landscape for T cell development.** The landscape and corresponding minimum action  
440 paths (MAPs) for the T cell developmental network are shown in 3-dimensional figure. White solid lines  
441 represent the MAP from ETP state to DN2a, DN2b, and DN3 states. Magenta solid lines represent the  
442 MAP from DN3 to DN2b, DN2a, and to ETP state. Dashed lines represent the direct MAP from ETP to  
443 DN3 and from DN3 to ETP states, respectively. Here, TCF-1 and PU1 are selected as the two coordinates  
444 for landscape visualization. See Supporting information for the landscapes using other pairs of TFs.

445  
446 To investigate the dynamical developmental process of T cell for multiple TFs, we visualized the 4-  
447 dimensional MAP from the ETP to the DN3 state by discretizing the levels of the four TFs. We found that  
448 for T cell development, TCF-1 is upregulated first, followed by the activation of GATA3. This leads to the  
449 complete inactivation of the alternative fate TF PU.1 and the activation of BCL11B (Figure 9).  
450 Interestingly, this temporal order is in good agreement with experimental observations [56]. These  
451 results suggest that the sequence of switching on or off for different TFs can be critical for the lineage  
452 commitment of T cell development. Moreover, under the *Bcl11b* knockout condition ( $k_B=0$ ), the  
453 landscape changes from a quadristable (four stable states coexist), to a bistable (ETP and DN2a) state  
454 (Figure S10), which is consistent with the bifurcation analysis (Figure 6) and experimental observations  
455 [28].

456  
457 **Figure 9. Discrete kinetic transition paths for T cell model.** Transition paths from ETP state to DN3 state  
458 in terms of levels of 4 different TFs. **A.** The relative TF levels are discretized to 0 or 1. 1 represents that  
459 the corresponding TFs are in the on (activated) state and 0 represents that the corresponding TFs are in  
460 the off (repressed) state. **B.** The relative TF levels are discretized to five values from low to high. X axis  
461 shows the time along the transition path.

462

463 **Global sensitivity analysis based on landscape topography reveals the critical factors for T cell**  
464 **development**

465 To identify the critical factors (regulations and TFs) which determine T cell development, we performed  
466 a global sensitivity analysis based on the landscape topography. Specifically, we use the transition action  
467 between attractors as a measure to quantify the feasibility of a transition between different attractors.  
468 A smaller transition action, corresponding to a larger energy barrier, means a more feasible transition  
469 from one attractor to another. In this way, by changing the parameters each at a time we can identify  
470 the critical parameters for T cell development (we use the transition from ETP to DN3 as an example). To  
471 do this, we constrict the models within the parameter region corresponding to the four-attractor system,  
472 so that we can make comparisons for the changes of transition actions as parameters are varied.

473 We identified some critical parameters of which the variations caused significant changes of transition  
474 actions between ETP and DN3 attractor. These parameters include the effective degradation rate of  
475 PU.1, (rdP), the regulated production rate of PU.1 (kP), the basal production rate of PU.1 (kP0), the  
476 threshold of the self-activation of PU.1 (KPP), and the threshold for the repression of PU.1 on GATA3  
477 (KGP) (Figure 10). In particular, the increase of the self-activation strength of PU.1 (i.e. decreased KPP)  
478 reduces the transition action from DN3 to DN2b (Figure 10B), indicating a less stable DN3 state and a  
479 more stable ETP state. This is reasonable because the PU.1 is a major TF for alternative cell fates (B-cell,  
480 dendritic-cell, and myeloid cell), and silencing of PU.1 is operationally important for T cell commitment  
481 [28]. Additionally, the increase of the repression strength of PU.1 on GATA3 (decreased KGP) raises the  
482 transition action from ETP to DN2a (Figure 10B), indicating a more stable ETP state and a less stable DN3  
483 state, which is consistent with the observation that GATA3 is a critical TF promoting T cell development.  
484 Overall, these results from sensitivity analysis indicate that the PU. 1 synthesis/degradation related

485 parameters, the GATA3 synthesis related parameters, and the regulations between PU.1 and GATA3 are  
486 critical to the dynamics and the cell fate decisions of T cell development. This indicates that the  
487 regulatory circuit between PU.1 and GATA3 plays critical roles for the cell fate determinations during T  
488 cell development.

489

490 **Figure 10. Global sensitivity analysis for T cell developmental model.** Sensitivity analysis was  
491 performed for the 39 parameters in the T cell model. The transition actions between different states  
492 ( $S_{ETP \rightarrow DN2a}$  and  $S_{DN3 \rightarrow DN2b}$ ) were calculated to quantify the sensitivity of parameters on the landscape. The  
493 Y-Axis represents the 39 parameters. The X-Axis represents the percentage of the transition action (S)  
494 changed relative to S without parameter changes. Here,  $S_{ETP \rightarrow DN2a}$  represents the transition action from  
495 attractor ETP to attractor DN2a (cyan bars), and  $S_{DN3 \rightarrow DN2b}$  represents the transition action from attractor  
496 DN3 to attractor DN2b (magenta bars). **A.** Each parameter is increased by 1%, individually. **B.** Each  
497 parameter is decreased by 1%, individually.

498

499

## 500 Discussion

501 In this study, we identified two types of network motif families that are responsible for generating a  
502 four-attractor dynamical system commonly observed in stepwise cell differentiation. Some instances of  
503 these motifs were previously described and analyzed in the context of binary or ternary switches during  
504 lineage transitions [57-61], but the systematic analysis for these motifs was not performed to our  
505 knowledge. In addition, the design principle for multiple intermediate states was not clear. Our  
506 approach provides a comprehensive framework for analyzing systems with a complex dynamical



507 property, a four-attractor system with stepwise transcriptional modulation, and we illustrate the  
508 intricate relationships among these motifs with an intuitive visualization method.

509 Previous studies on biological circuits governing irreversible transitions focused on the analysis of toggle  
510 switches which generate none-or-all type of responses [62,63]. Our work suggests that multistep or  
511 graded responses can be associated with irreversible transitions as well. Given the importance of graded  
512 response in various biological scenarios [64-66], we expect the design strategy that we found can be  
513 useful for discovery of natural-occurring irreversible graded responses or construction of synthetic  
514 biological circuits producing these responses. Our work also suggests that the response to signals, or the  
515 progression of lineage transition, may be proportional to the intensity and/or the duration of the signal.  
516 This is consistent with the previous observations that the duration of the morphogen signal can be  
517 critical for cell lineage choice [67,68]. Of note, when signal strength is converted to digital (none-or-all)  
518 response in early phases of signal transduction, its duration can play an essential role in determining the  
519 graded response [69].

520 In our systematic exploration in the network topology space, we took the assumption that network  
521 structure is correlated with its function, i.e. assuming the existence of functional motif structure in  
522 transcription regulatory networks. The notion of network motifs is very helpful for understanding many  
523 complex biological systems [70,71], but the richness of dynamic behaviors of these motifs is beyond  
524 their structures – distinct kinetic rates in the same motif can produce diverse responses [72]. Therefore,  
525 it is expected that the motifs that we discovered may be able to generate dynamical behaviors different  
526 from the four-attractor system (we will discuss some of them in the following paragraphs). We also  
527 expect that some of network motifs can be responsible for multiple functions by themselves, and this  
528 multifunctionality may explain the diverse motifs that we found for the four-attractor systems in the  
529 biological examples. Future work is warranted to examine the distributions of the diverse functions in

530 the parameter space of the motifs that we found. Nonetheless, it is important to understand the  
531 capacity of the network motifs in terms of their functional outputs. Our work provides a holistic view of  
532 the potential network motif structures governing multistep cell lineage transitions.

533 Although network motifs with three positive feedback loops closing at a single factor (Type I motifs  
534 discussed in this study) were not systematically analyzed in previously studies to our knowledge, some  
535 simpler versions of Type I motif, e.g. a pair of interconnected positive feedback loops, have been  
536 described in various systems such as the epithelial-mesenchymal transition and the cancer progression  
537 [59,73]. These systems typically govern ternary switches with a single intermediate state. These studies  
538 and ours suggest a correlation between the number of positive feedback loops and the number of the  
539 intermediate states the system may be able to generate. In fact, early studies on multistability systems  
540 have shown the requirement of positive feedback loops for generating multiple steady states [74],  
541 which was later proved mathematically [75]. Intriguingly, an ultrahigh feedback system similar to the  
542 Type I motifs was shown to govern irreversible transitions with low differentiation rates for adipocytes  
543 [76]. It would be interesting to examine whether controlling the low differentiation rate through cell-to-  
544 cell variability and controlling the number of intermediate states suggested by our model can be  
545 achieved in the same system. Our findings are consistent with the earlier work in that they highlight the  
546 importance of this type of signaling motifs in controlling cell differentiation by preventing the direct and  
547 homogeneous transition from the initial state to the final one.

548 Near symmetrical parameters in models based on a particular instance of the Type II motif class (the one  
549 with mutually inhibiting TFs) have been widely used to explain stochastic lineage choice observed in  
550 embryonic stem cells, developing hematopoietic cells and CD4<sup>+</sup> T cells [77,78]. Our findings with Type II  
551 motifs complement these studies with newly identified functions of these motifs for cell differentiation.  
552 Instead of the stochasticity that breaks the symmetry of this motif, the Notch signal may be responsible

553 for switching the system from one side (PU.1 high) to another (PU.1 low) in a stepwise fashion, and the  
554 intermediate states mark the stable stages where the system is relatively balanced in terms of two  
555 groups of competing TFs.

556 It was previously suggested that the network consisting of four core transcription factors governs a  
557 bistable switch with irreversible transition [41]. Our models based on this network provide explanations  
558 for additional experimental observations with respect to the multistep feature of the early T cell  
559 development. Although it is possible that interconnection of multiple positive feedback loops simply  
560 enhances the robustness of the bistable switches, the observation that several important irreversible  
561 transitions in cell cycle progression are primarily controlled by two positive feedback loops implies that  
562 the enrichment of the positive feedback loops in the T cell transcriptional network is unlikely due to the  
563 intrinsic biophysical limits of positive feedback loops in generating bistable switches [63,79]. Instead,  
564 other cellular functions, such as generating the multiple intermediate states, might be the performance  
565 objectives for the design of this network.

566 Our model of early T cell development suggests that the differentiation program may be stopped at  
567 multiple locations in the state space of transcription levels of key factors. These multiple attractors may  
568 correspond to the lineage branching points at which the progenitor cells are given opportunities to be  
569 converted to T cell as well as other types of lymphocytes. As such, it is possible that this dynamical  
570 property is exploited to achieve a better control for the fate determination of the lymphoid progenitor  
571 cells at systems level. Given that subpopulations of NK cells and DCs are generated by the thymus [80-  
572 82], the multistep lineage transition provides a basis for channeling the lymphoid progenitor to multiple  
573 lineages in a precise manner.

574 Based on the recent landscape-path theory and the T cell gene regulatory network model, we  
575 investigated the stochastic dynamics of T cell development. We identified four stable cell states

576 characterized by attractors on the landscape including ETP/DN1, DN3, and two intermediate states  
577 (DN2a and DN2b). We also calculated the kinetic transition paths between different cell states from  
578 minimum action path approaches. Importantly, from the MAPs of T cell development, we found that  
579 different TFs are switched on or off in different orders. For example, TCF-1 needs to be first activated,  
580 and then GATA3 is activated, leading to the inactivation of PU.1 and activation of BCL11B. These  
581 predictions agree well with experiments [28,56], which provides further validations for our  
582 mathematical model.

583 In our models, we only considered four core factors based on previous published T cell gene regulatory  
584 network for simplicity [41]. In the realistic biological system, there are more factors critical to T cell  
585 development [28]. It would be interesting to incorporate other important factors into the network and  
586 construct a more realistic model for T cell development. By studying the landscape of more  
587 comprehensive T cell development network, we will better understand the underlying regulatory  
588 machinery and obtain more insights into the intricate mechanisms for T cell development.

589 In summary, we identified a large family of network motifs that can generate four attractors that are  
590 observed in various biological systems involving cell lineage transition. We built a mathematical model  
591 for transcriptional network controlling early T cell development, and we found that the network  
592 underlying this developmental process is enriched with the motifs that we identified. The system with  
593 the four attractors has a remarkable irreversibility for transitions to multiple intermediate states when  
594 the differentiation signal is varied. We suggest that this multistep process may be useful for precise  
595 control of the differentiation of lymphoid progenitor cells towards T cell and other cell types. Our T cell  
596 model provides new insights into the complex developmental or regeneration processes, and our  
597 combined approaches of comprehensive analysis of network motifs for generating multistable systems  
598 and landscape-path framework provide a powerful tool for studying a wide range of networks  
599 controlling cell lineage transitions.

## 600 **Methods**

601

### 602 **Framework of mathematical modeling**

603 We used ordinary differential equations (ODEs) to describe the dynamics of the concentrations of  
604 transcription factors (TFs). We used Hill function to describe the transcriptional regulation by TFs. Each  
605 ODE has the following

607 form:

$$\dot{X}_i(t) = k_{0,X_i} + k_{X_i} \sum_{j=1}^n \beta_{i,j} \frac{(1 - \theta) + \theta \left(\frac{X_j}{K_{i,j}}\right)^{n_{i,j}}}{1 + \left(\frac{X_j}{K_{i,j}}\right)^{n_{i,j}}} - r_{d,X_i} X_i$$

608

609 (1)

610

611 Here,  $X_i$  represents the concentration of a transcription factor (TF).  $k_{0,X_i}$  is the basal production rate of  
612 the TF in the absence of any regulator.  $k_{X_i}$  is the maximum production rate under the control of the  
613 transcriptional activators and inhibitors of this TF.  $\beta_{i,j}$  denotes the weight of the influence of the TF  $j$  on  
614  $i$ . The sum of the Hill functions determines the regulation of the production of this TF by other TFs. In  
615 each term of the summation,  $\theta = 1$  when the regulating TF ( $X_j$ ) is an activator.  $\theta = 0$  when the  
616 regulating TF is an inhibitor.  $K_{i,j}$  is the apparent dissociation constant of the regulating TF binding to its  
617 regulatory element of the promoter, and it describes the effectiveness of the regulation in terms of the  
618 concentration of the TF.  $n$  is the total number of regulating TFs.  $r_{d,X_i}$  is the effective degradation rate  
619 constant. The production rate of the proteins is assumed to be linearly correlated with mRNA  
620 production rate. Similar generalized forms of Hill function were previously used for analysis of a variety

621 of gene regulatory networks [48,83]. One time unit of our model corresponds to 20 minutes, and all the  
622 parameters are dimensionless.

623 To exclude the possibility that our conclusions are sensitive to the choice of the form of equations, we  
624 used an alternative form of ODE to describe the regulatory networks:

625

$$\dot{X}_i(t) = k_{0,X_i} + k_{X_i} \prod_{j=1}^n \frac{(1 - \theta) + \theta \left(\frac{X_j}{K_{i,j}}\right)^{n_{i,j}}}{1 + \left(\frac{X_j}{K_{i,j}}\right)^{n_{i,j}}} - r_{d,X_i} X_i$$

626  
627 (2)

628

629 In these ODEs, multiplication of Hill functions was used instead of addition. Similar forms of Hill function  
630 were also previously used for modeling a variety of gene regulatory networks [60,84]. With this form,  
631 the two types of network motifs that generated the four-attractor behavior are the same as those  
632 discovered with the additive form of Hill functions (Figure S3). In fact, using both forms of equations  
633 gave rise to the same number of network topologies (216 topologies with the steady states shown in  
634 both Figure S3 and Figure S4). Therefore, our conclusions are robust in terms of the choice of equation  
635 form.

636 During topology searching, random parameters values were chosen from defined ranges (Table S1, see  
637 below).

638

### 639 **Topology searching for four-attractor systems**

640 Network topology searching was first performed for all possible topologies involving up to 3 nodes (TFs)  
641 and 6 regulations that are able to generate four-attractor systems with stepwise changes of TF levels.

642 Three-node networks were previously used to explore several types of functional dynamics of network  
643 motifs [38,85]. Isometric topologies were removed in the search. For each topology, we performed  
644 random sampling with  $10^6$  parameter sets. For each parameter set, we selected 125 initial conditions in  
645 the three-dimensional state space  $((0, 3.3)$  for each variable) using Latin Hypercube sampling, and then  
646 solved the ODEs numerically. We stopped the simulations at time point 500 and checked if the 125 ODE  
647 systems are stabilized at four or more distinct steady states. We next checked if the changes of the TFs  
648 are monotonically coupled. We first ordered the steady states by the levels of one TF, and then we  
649 looked for scenarios in which all other TFs monotonically increase or decrease with the ordered TF (i.e.  
650 the attractors with stepwise changes of the TFs). We excluded the scenarios in which one TF is not  
651 monotonically correlated with others in terms of their levels at the four attractors. Models that  
652 generated oscillations at the final time point were also excluded. The parameter sets which produced  
653 the stepwise changes of steady state were accepted and their associated network topologies were  
654 analyzed. Parameter values for the minimum topologies are listed in Table S2.

655 Complexity atlas was plotted for the obtained network topologies as described previously by Jiménez et  
656 al [40] (Figure 2B and Figure 3C).

657

### 658 **Transcriptional network model for early T cell development**

659 We built a model for early T cell development based on the regulations that were previously shown  
660 experimentally [86-99]. Information about experimental evidence is described in Table S3. The form of  
661 equations is similar to Equation (2). We chose this multiplicative form of Hill functions because earlier  
662 experimental study suggested that regulations of Bcl11b gene are combined via an 'and' logic gate [100],  
663 which favors the use of multiplication. Although similar detailed information is not available for other  
664 TFs, we have shown that our main conclusions with respect to the multistep transitions controlled by a

665 network motif family do not depend on the choice of the form of equations (Figure 2 and Figure S4). Full  
666 list of equations is included in Text S1. The parameter values were obtained by random searching  
667 described above followed by minor manual adjustment. The parameter values are listed in Table S4. To  
668 explore the subnetworks of the T cell development model that are essential for the four-stage transition,  
669 we performed similar exhaustive search in a set of 1553 non-redundant topologies (2047 subnetworks)  
670 to find functional circuit in the model. We obtained 568 topologies (701 topologies) from the search,  
671 and we analyzed them with complexity atlas. Isometric topologies were removed in the simulations, but  
672 they are included in the complexity atlas so that we do not mix isometric topologies with possibly  
673 differential biological meanings specific to certain genes.

674 During bifurcation analysis, the value of the parameter  $N$  (Notch signal strength) or  $k_{\text{BCL11B}}$  (maximum  
675 production rate of BCL11B) is varied and the changes of the steady states of the system were analyzed.  
676 We let  $k_{\text{BCL11B}} = 0$  to simulate the *Bcl11b* knockout condition.

677 To simulate the system under various scenarios of Notch signaling, we first varied the strength and/or  
678 duration of the Notch signal and checked the steady state distribution of the system under the varying  
679 strengths and durations. We tested 200X200 combinations of strengths and durations of Notch signals  
680 and obtained the phenotypes of the cells at the steady state. To simulate the fluctuating Notch signals,  
681 we divided the time window of the simulation into small intervals (0.1 unites of time). For each interval,  
682 we used a random number with a specified mean and an additive noise. The mean of the Notch signal  
683 first increased overtime and then became attenuated.

684

#### 685 **Enrichment analysis of the four-attractor motifs in the T cell model**

686 To quantify the enrichment of various types of motifs, we used the generic definition of p-value: the p-  
687 value for a particular motif is the probability of obtaining at least  $n$  number of motifs from a random



688 network population, where  $n$  is the observed number of such motif in the T cell network. To compute  
689 the p-values, we first counted the frequencies of the positive feedback loop, Type I motif and Type II  
690 motif in the T cell model (i.e.  $n_1, n_2, n_3, n_4$  representing the numbers of positive feedback loops, Type I  
691 motifs, Type II motifs, and the sum of the Type I and Type II motifs respectively). Random networks were  
692 generated using two methods: 1) for each regulation in the existing T cell model, we randomly reassign  
693 its source and target TFs (referred to as 'permuted regulations'), and 2) for each pair of TFs from the  
694 network, we randomly assign a regulation (positive, negative or none) (referred to as 'permuted  
695 regulations'). For each of the two methods, we generated  $10^5$  networks, and we calculated the empirical  
696 p-values by counting the number of the random networks with the numbers of motifs not less than  
697 those of respective motifs in the T cell network. The method with permuted regulations is more  
698 biologically relevant because the number of the positive and negative regulations are retained in the  
699 random networks. We used the second approach as alternative to exclude the possibility that the  
700 conclusion of the trend of the p-values is due to the low number of networks containing the extreme  
701 amount of the motifs.

702

### 703 **Optimization for performance comparison of two subnetworks**

704 Due to the difficulty to compare the performances of regulatory circuits with different complexities in  
705 general, we selected two specific instances of Type I network motif for comparison. One of them  
706 contains only one Type I motif, whereas the other one contains multiple motifs. For each topology, we  
707 reduced the system to one ODE with quasi-steady state assumption and defined a continuous  
708 production rate function that can produce four attractors as a surrogate function (see Text S1). Multiple  
709 runs of optimization using differential evolution algorithm was used, and 500 converged parameter sets

710 for each circuit were used for comparison. This optimization method was previously used for finding  
711 optimum parameter sets and for comparing the performances of regulatory circuits [58,101,102].

712

### 713 **Self-consistent mean field approximation for the quantification of energy landscape**

714 The temporal evolution a dynamical system was determined by a probabilistic diffusion equation  
715 (Fokker-Planck equation). Given the system state  $P(X_1, X_2, \dots, X_N, t)$ , where  $X_1, X_2, \dots, X_N$ , represent the  
716 concentrations of molecules or gene expression levels, we have N-dimensional partial differential  
717 equation, which are difficult to solve because the system has a very large state space. Following a self-  
718 consistent mean field approach [48,54,103,104], we split the probability into the products of the  
719 individual probabilities:  $P(X, t) = P(X_1, X_2, \dots, X_N, t) = \prod_i^N P_i(X_i, t)$  and solve the probability self-  
720 consistently. In this way, we effectively reduced the dimensionality of the system from MN to MN (M is  
721 the number of possible states that each gene could have), and thus made the computation of the high-  
722 dimensional probability distribution tractable.

723 Based on the diffusion equations, when the diffusion coefficient D is small, the moment equations can  
724 be approximated to [105,106]:

$$725 \quad \dot{\bar{x}}(t) = F(\bar{x}(t)) \quad (3)$$

$$726 \quad \dot{\sigma}(t) = \sigma(t)A^T(t) + A^T(t)\sigma(t) + 2D(\bar{x}(t)) \quad (4)$$

727 Here,  $\bar{x}(t)$ ,  $\sigma(t)$  and  $A(t)$  are vectors and tensors.  $\sigma(t)$  denotes the covariance matrix and  $A(t)$  is the  
728 jacobian matrix of  $F(\bar{x}(t))$ .  $A^T(t)$  is the transpose of  $A(t)$ . The elements of matrix A are specified as:

729  $A_{ij} = \frac{\partial F_i(X(t))}{\partial x_j(t)}$ . By solving these equations, we can acquire  $\bar{x}(t)$  and  $\sigma(t)$ . Here, we consider only the

730 diagonal elements of  $\sigma(t)$  from the mean field approximation. Then, the evolution of the probability  
731 distribution for each variable can be acquired from the Gaussian approximation:

732 
$$P(x, t) = \frac{1}{\sqrt{2\pi\sigma(t)}} e^{-\frac{(x-\bar{x}(t))^2}{2\sigma(t)}} \quad (5)$$

733 The probability distribution acquired above corresponds to one stable steady state or the basin of  
734 attraction. If the system has multiple stable steady states, there should be several probability  
735 distributions localized at each basin with different variances. Thus, the total probability is the sum of all  
736 these probability distributions with different weights. From the self-consistent approximation, we can  
737 extend this formulation to the multi-dimensional case by assuming that the total probability is the  
738 product of each individual probability for each variable. Finally, with the total probability, we can  
739 construct the potential landscape by:  $U(x) = -\ln P_{ss}(x)$ . In this work, we define two quantities based on  
740 the landscape theory. One is the energy barrier height, which is defined as the energy difference  
741 between the local minimum and the corresponding saddle point. Another quantity is the transition  
742 action, which is defined as the minimum action from one attractor to the other. These two quantities  
743 both measure the difficulty of the transitions. However, the transition actions are suggested to provide a  
744 more accurate description for the barrier crossing between attractors or the transition rate {Feng, 2014  
745 #113}. Therefore, we used the transition actions to quantify the difficulty of the transitions between  
746 attractors in this work (see the following section for minimum action paths).

747

#### 748 **Minimum action paths from optimization**

749 Following the approaches based on the Freidlin-Wentzell theory [52,107,108], for a dynamical system  
750 with multistability the most probable transition path from one attractor  $i$  at time 0 to attractor  $j$  at time  
751  $T$ ,  $\phi_{ij}^*(t)$ ,  $t \in [0, T]$ , can be acquired by minimizing the action functional over all possible paths:

752 
$$S_T[\phi_{ij}] = \frac{1}{2} \int_0^T |\dot{\phi}_{ij} - \mathbf{F}(\phi_{ij})|^2 dt \quad (6)$$

753 Here  $\mathbf{F}(\phi_{ij})$  is the driving force. This optimal path is called minimized action path (MAP). We calculated

754 MAPs numerically by applying minimum action methods used in [52,107].

755

756 **References**

- 757 1. Holtzer H, Weintraub H, Mayne R, Mochan B (1972) The cell cycle, cell lineages, and cell  
758 differentiation. *Current topics in developmental biology*: Elsevier. pp. 229-256.
- 759 2. Slack JMW (2009) *Essential developmental biology*: John Wiley & Sons.
- 760 3. Mariani L, Löhning M, Radbruch A, Höfer T (2004) Transcriptional control networks of cell  
761 differentiation: insights from helper T lymphocytes. *Progress in biophysics and molecular biology*  
762 86: 45-76.
- 763 4. Bernstein BE, Mikkelsen TS, Xie X, Kamal M, Huebert DJ, et al. (2006) A bivalent chromatin structure  
764 marks key developmental genes in embryonic stem cells. *Cell* 125: 315-326.
- 765 5. Ellmeier W, Taniuchi I (2016) *Transcriptional control of lineage differentiation in immune cells*:  
766 Springer.
- 767 6. Wang X, Li J (2017) An intermediate cell state allows rerouting of cell fate. *Journal of Biological*  
768 *Chemistry* 292: 19133-19134.
- 769 7. Richard A, Boullu L, Herbach U, Bonnafox A, Morin V, et al. (2016) Single-cell-based analysis  
770 highlights a surge in cell-to-cell molecular variability preceding irreversible commitment in a  
771 differentiation process. *PLoS biology* 14: e1002585.
- 772 8. Mojtahedi M, Skupin A, Zhou J, Castano IG, Leong-Quong RYY, et al. (2016) Cell fate decision as high-  
773 dimensional critical state transition. *PLoS biology* 14: e2000640.
- 774 9. Lu KT, Kanno Y, Cannons JL, Handon R, Bible P, et al. (2011) Functional and epigenetic studies reveal  
775 multistep differentiation and plasticity of in vitro-generated and in vivo-derived follicular T  
776 helper cells. *Immunity* 35: 622-632.
- 777 10. Chang HH, Oh PY, Ingber DE, Huang S (2006) Multistable and multistep dynamics in neutrophil  
778 differentiation. *BMC cell biology* 7: 11.

- 779 11. MacLean AL, Hong T, Nie Q (2018) Exploring intermediate cell states through the lens of single cells.  
780 Current Opinion in Systems Biology 9: 32-41.
- 781 12. Wang J, Sun Q, Morita Y, Jiang H, Groß A, et al. (2012) A Differentiation Checkpoint Limits  
782 Hematopoietic Stem Cell Self-Renewal in Response to DNA Damage. Cell 148: 1001-1014.
- 783 13. Berkowska MA, van der Burg M, van Dongen JJM, van Zelm MC (2011) Checkpoints of B cell  
784 differentiation: visualizing Ig-centric processes. Annals of the New York Academy of Sciences  
785 1246: 11-25.
- 786 14. Bod L, Douguet L, Auffray C, Lengagne R, Bekkat F, et al. (2018) IL-4-Induced Gene 1: A Negative  
787 Immune Checkpoint Controlling B Cell Differentiation and Activation. The Journal of Immunology  
788 200: 1027-1038.
- 789 15. Ikawa T, Hirose S, Masuda K, Kakugawa K, Satoh R, et al. (2010) An essential developmental  
790 checkpoint for production of the T cell lineage. Science 329: 93-96.
- 791 16. Rothenberg EV, Moore JE, Yui MA (2008) Launching the T-cell-lineage developmental programme.  
792 Nature Reviews Immunology 8: 9.
- 793 17. Mingueneau M, Kreslavsky T, Gray D, Heng T, Cruse R, et al. (2013) The transcriptional landscape of  
794  $\alpha\beta$  T cell differentiation. Nature immunology 14: 619.
- 795 18. Ha VL, Luong A, Li F, Casero D, Malvar J, et al. (2017) The T-ALL related gene BCL11B regulates the  
796 initial stages of human T-cell differentiation. Leukemia 31: 2503.
- 797 19. Rothenberg EV (2011) T cell lineage commitment: identity and renunciation. The Journal of  
798 Immunology 186: 6649-6655.
- 799 20. Yui MA, Rothenberg EV (2014) Developmental gene networks: a triathlon on the course to T cell  
800 identity. Nature Reviews Immunology 14: 529-545.
- 801 21. Taghon T, Yui MA, Rothenberg EV (2007) Mast cell lineage diversion of T lineage precursors by the  
802 essential T cell transcription factor GATA-3. Nature immunology 8: 845.

- 803 22. Franco CB, Scripture-Adams DD, Proekt I, Taghon T, Weiss AH, et al. (2006) Notch/Delta signaling  
804 constrains reengineering of pro-T cells by PU. 1. *Proceedings of the National Academy of*  
805 *Sciences* 103: 11993-11998.
- 806 23. Rosenbauer F, Owens BM, Yu L, Tumang JR, Steidl U, et al. (2006) Lymphoid cell growth and  
807 transformation are suppressed by a key regulatory element of the gene encoding PU. 1. *Nature*  
808 *genetics* 38: 27.
- 809 24. Luc S, Luis TC, Boukarabila H, Macaulay IC, Buza-Vidas N, et al. (2012) The earliest thymic T cell  
810 progenitors sustain B cell and myeloid lineage potential. *Nature immunology* 13: 412.
- 811 25. Li P, Burke S, Wang J, Chen X, Ortiz M, et al. (2010) Reprogramming of T cells to natural killer-like  
812 cells upon Bcl11b deletion. *Science* 329: 85-89.
- 813 26. Li L, Leid M, Rothenberg EV (2010) An early T cell lineage commitment checkpoint dependent on the  
814 transcription factor Bcl11b. *Science* 329: 89-93.
- 815 27. Manesso E, Chickarmane V, Kueh HY, Rothenberg EV, Peterson C (2013) Computational modelling of  
816 T-cell formation kinetics: output regulated by initial proliferation-linked deferral of  
817 developmental competence. *Journal of The Royal Society Interface* 10: 20120774.
- 818 28. Longabaugh WJR, Zeng W, Zhang JA, Hosokawa H, Jansen CS, et al. (2017) Bcl11b and combinatorial  
819 resolution of cell fate in the T-cell gene regulatory network. *Proceedings of the National*  
820 *Academy of Sciences* 114: 5800-5807.
- 821 29. Hong T, Watanabe K, Ta CH, Villarreal-Ponce A, Nie Q, et al. (2015) An *Ovol2-Zeb1* Mutual Inhibitory  
822 Circuit Governs Bidirectional and Multi-step Transition between Epithelial and Mesenchymal  
823 States. *PLoS computational biology* 11: e1004569.
- 824 30. Jolly MK, Tripathi SC, Jia D, Mooney SM, Celiktaş M, et al. (2016) Stability of the hybrid  
825 epithelial/mesenchymal phenotype. *Oncotarget* 7: 27067.

- 826 31. Mandal M, Ghosh B, Anura A, Mitra P, Pathak T, et al. (2016) Modeling continuum of epithelial  
827 mesenchymal transition plasticity. *Integrative Biology* 8: 167-176.
- 828 32. Blanpain C, Fuchs E (2009) Epidermal homeostasis: a balancing act of stem cells in the skin. *Nature*  
829 *reviews Molecular cell biology* 10: 207.
- 830 33. Du H, Wang Y, Haensel D, Lee B, Dai X, et al. (2018) Multiscale modeling of layer formation in  
831 epidermis. *PLoS computational biology* 14: e1006006.
- 832 34. Huang RY, Wong MK, Tan TZ, Kuay KT, Ng AH, et al. (2013) An EMT spectrum defines an anoikis-  
833 resistant and spheroidogenic intermediate mesenchymal state that is sensitive to e-cadherin  
834 restoration by a src-kinase inhibitor, saracatinib (AZD0530). *Cell death & disease* 4: e915.
- 835 35. Zhang J, Tian XJ, Zhang H, Teng Y, Li R, et al. (2014) TGF- $\beta$  -induced epithelial-to-mesenchymal  
836 transition proceeds through stepwise activation of multiple feedback loops. *Science Signaling* 7:  
837 ra91-ra91.
- 838 36. Grosse-Wilde A, Fouquier d'Herouel A, McIntosh E, Ertaylan G, Skupin A, et al. (2015) Stemness of  
839 the hybrid Epithelial/Mesenchymal State in Breast Cancer and Its Association with Poor Survival.  
840 *PloS one* 10: e0126522.
- 841 37. Koster MI, Roop DR (2007) Mechanisms regulating epithelial stratification. *Annu Rev Cell Dev Biol* 23:  
842 93-113.
- 843 38. Ma W, Trusina A, El-Samad H, Lim WA, Tang C (2009) Defining network topologies that can achieve  
844 biochemical adaptation. *Cell* 138: 760-773.
- 845 39. Fu Y, Glaros T, Zhu M, Wang P, Wu Z, et al. (2012) Network topologies and dynamics leading to  
846 endotoxin tolerance and priming in innate immune cells. *PLoS computational biology* 8:  
847 e1002526.
- 848 40. Jiménez A, Cotterell J, Munteanu A, Sharpe J (2017) A spectrum of modularity in multi-functional  
849 gene circuits. *Molecular systems biology* 13: 925.



- 850 41. Manesso E, Kueh HY, Freedman G, Rothenberg EV, Peterson C (2016) Irreversibility of T-cell  
851 specification: insights from computational modelling of a minimal network architecture. *PLoS*  
852 *one* 11: e0161260.
- 853 42. Conradi C, Flockerzi D, Raisch J, Stelling J (2007) Subnetwork analysis reveals dynamic features of  
854 complex (bio) chemical networks. *Proceedings of the National Academy of Sciences* 104: 19175-  
855 19180.
- 856 43. Zhang JA, Mortazavi A, Williams BA, Wold BJ, Rothenberg EV (2012) Dynamic transformations of  
857 genome-wide epigenetic marking and transcriptional control establish T cell identity. *Cell* 149:  
858 467-482.
- 859 44. Elowitz MB, Levine AJ, Siggia ED, Swain PS (2002) Stochastic gene expression in a single cell. *Science*  
860 297: 1183-1186.
- 861 45. Kærn M, Elston TC, Blake WJ, Collins JJ (2005) Stochasticity in gene expression: from theories to  
862 phenotypes. *Nature Reviews Genetics* 6: 451.
- 863 46. Waddington CH (1957) *The strategy of the genes. A discussion of some aspects of theoretical biology.*  
864 *With an appendix by H. Kacser. The strategy of the genes A discussion of some aspects of*  
865 *theoretical biology With an appendix by H Kacser.*
- 866 47. Wang J, Zhang K, Xu L, Wang E (2011) Quantifying the Waddington landscape and biological paths for  
867 development and differentiation. *Proceedings of the National Academy of Sciences* 108: 8257-  
868 8262.
- 869 48. Li C, Wang J (2013) Quantifying cell fate decisions for differentiation and reprogramming of a human  
870 stem cell network: landscape and biological paths. *PLoS computational biology* 9: e1003165.
- 871 49. Li C, Wang J (2013) Quantifying Waddington landscapes and paths of non-adiabatic cell fate  
872 decisions for differentiation, reprogramming and transdifferentiation. *Journal of The Royal*  
873 *Society Interface* 10: 20130787.

- 874 50. Li C, Wang J (2015) Quantifying the landscape for development and cancer from a core cancer stem  
875 cell circuit. *Cancer research* 75: 2607-2618.
- 876 51. Liao C, Lu T (2013) A minimal transcriptional controlling network of regulatory T cell development.  
877 *The Journal of Physical Chemistry B* 117: 12995-13004.
- 878 52. Zhou X, Ren W, E W (2008) Adaptive minimum action method for the study of rare events. *The*  
879 *Journal of chemical physics* 128: 104111.
- 880 53. Li C (2017) Identifying the optimal anticancer targets from the landscape of a cancer–immunity  
881 interaction network. *Physical Chemistry Chemical Physics* 19: 7642-7651.
- 882 54. Wang J, Li C, Wang E (2010) Potential and flux landscapes quantify the stability and robustness of  
883 budding yeast cell cycle network. *Proceedings of the National Academy of Sciences* 107: 8195-  
884 8200.
- 885 55. Wang J, Xu L, Wang E (2008) Potential landscape and flux framework of nonequilibrium networks:  
886 robustness, dissipation, and coherence of biochemical oscillations. *Proceedings of the National*  
887 *Academy of Sciences* 105: 12271-12276.
- 888 56. Rothenberg EV, Champhekar A, Damle S, Del Real MM, Kueh HY, et al. (2013) Transcriptional  
889 establishment of cell-type identity: dynamics and causal mechanisms of T-cell lineage  
890 commitment. *Cold Spring Harbor Laboratory Press*. pp. 31-41.
- 891 57. Guantes R, Poyatos JF (2008) Multistable Decision Switches for Flexible Control of Epigenetic  
892 Differentiation. *PLoS Computational Biology* 4: e1000235.
- 893 58. Hong T, Oguz C, Tyson JJ (2015) A Mathematical Framework for Understanding Four-Dimensional  
894 Heterogeneous Differentiation of CD4+ T Cells. *Bulletin of mathematical biology* 77: 1046-1064.
- 895 59. Lu M, Jolly MK, Levine H, Onuchic JN, Ben-Jacob E (2013) MicroRNA-based regulation of epithelial-  
896 hybrid-mesenchymal fate determination. *Proceedings of the National Academy of Sciences of*  
897 *the United States of America* 10.1073/pnas.1318192110.

- 898 60. Huang B, Xia Y, Liu F, Wang W (2016) Realization of tristability in a multiplicatively coupled dual-loop  
899 genetic network. *Scientific reports* 6: 28096.
- 900 61. Yu P, Nie Q, Tang C, Zhang L (2018) Nanog induced intermediate state in regulating stem cell  
901 differentiation and reprogramming. *BMC systems biology* 12: 22.
- 902 62. Gardner TS, Cantor CR, Collins JJ (2000) Construction of a genetic toggle switch in *Escherichia coli*.  
903 *Nature* 403: 339.
- 904 63. Novak B, Tyson JJ, Gyorffy B, Csikasz-Nagy A (2007) Irreversible cell-cycle transitions are due to  
905 systems-level feedback. *Nature cell biology* 9: 724.
- 906 64. Stewart-Ornstein J, Nelson C, DeRisi J, Weissman JS, El-Samad H (2013) Msn2 coordinates a  
907 stoichiometric gene expression program. *Current Biology* 23: 2336-2345.
- 908 65. Rogers KW, Schier AF (2011) Morphogen gradients: from generation to interpretation. *Annual review*  
909 *of cell and developmental biology* 27: 377-407.
- 910 66. Giorgetti L, Siggers T, Tiana G, Caprara G, Notarbartolo S, et al. (2010) Noncooperative interactions  
911 between transcription factors and clustered DNA binding sites enable graded transcriptional  
912 responses to environmental inputs. *Molecular cell* 37: 418-428.
- 913 67. Hayes L, Ralls S, Wang H, Ahn S (2013) Duration of Shh signaling contributes to mDA neuron diversity.  
914 *Developmental biology* 374: 115-126.
- 915 68. Balaskas N, Ribeiro A, Panovska J, Dessaud E, Sasai N, et al. (2012) Gene regulatory logic for reading  
916 the Sonic Hedgehog signaling gradient in the vertebrate neural tube. *Cell* 148: 273-284.
- 917 69. Miskov-Zivanov N, Turner MS, Kane LP, Morel PA, Faeder JR (2013) The duration of T cell stimulation  
918 is a critical determinant of cell fate and plasticity. *Sci Signal* 6: ra97-ra97.
- 919 70. Alon U (2007) Network motifs: theory and experimental approaches. *Nature Reviews Genetics* 8: 450.
- 920 71. Hart Y, Alon U (2013) The utility of paradoxical components in biological circuits. *Molecular cell* 49:  
921 213-221.

- 922 72. Ingram PJ, Stumpf MPH, Stark J (2006) Network motifs: structure does not determine function. BMC  
923 genomics 7: 108.
- 924 73. Lu M, Jolly MK, Gomoto R, Huang B, Onuchic J, et al. (2013) Tristability in cancer-associated  
925 microRNA-TF chimera toggle switch. The journal of physical chemistry B 117: 13164-13174.
- 926 74. Thomas R (1981) On the relation between the logical structure of systems and their ability to  
927 generate multiple steady states or sustained oscillations. Numerical methods in the study of  
928 critical phenomena: Springer. pp. 180-193.
- 929 75. Soulé C (2003) Graphic requirements for multistationarity. ComPlexUs 1: 123-133.
- 930 76. Ahrends R, Ota A, Kovary KM, Kudo T, Park BO, et al. (2014) Controlling low rates of cell  
931 differentiation through noise and ultrahigh feedback. Science 344: 1384-1389.
- 932 77. Huang S (2013) Hybrid T-helper cells: stabilizing the moderate center in a polarized system. PLoS  
933 biology 11: e1001632.
- 934 78. Graf T, Enver T (2009) Forcing cells to change lineages. Nature 462: 587.
- 935 79. Yao G, Lee TJ, Mori S, Nevins JR, You L (2008) A bistable Rb-E2F switch underlies the restriction point.  
936 Nature cell biology 10: 476.
- 937 80. Ardavin C, Wu L, Li C-L, Shortman K (1993) Thymic dendritic cells and T cells develop simultaneously  
938 in the thymus from a common precursor population. Nature 362: 761.
- 939 81. Wu L, Li C-L, Shortman K (1996) Thymic dendritic cell precursors: relationship to the T lymphocyte  
940 lineage and phenotype of the dendritic cell progeny. Journal of Experimental Medicine 184: 903-  
941 911.
- 942 82. Vosshenrich CAJ, García-Ojeda ME, Samson-Villéger SI, Pasqualetto V, Enault L, et al. (2006) A thymic  
943 pathway of mouse natural killer cell development characterized by expression of GATA-3 and  
944 CD127. Nature immunology 7: 1217.

- 945 83. Huang B, Lu M, Jia D, Ben-Jacob E, Levine H, et al. (2017) Interrogating the topological robustness of  
946 gene regulatory circuits by randomization. *PLoS computational biology* 13: e1005456.
- 947 84. Holmes WR, Reyes de Mochel NS, Wang Q, Du H, Peng T, et al. (2017) Gene Expression Noise  
948 Enhances Robust Organization of the Early Mammalian Blastocyst. *PLOS Computational Biology*  
949 13: e1005320.
- 950 85. Prill RJ, Iglesias PA, Levchenko A (2005) Dynamic properties of network motifs contribute to  
951 biological network organization. *PLoS biology* 3: e343.
- 952 86. Weber BN, Chi AW, Chavez A, Yashiro-Ohtani Y, Yang Q, et al. (2011) A critical role for TCF-1 in T-  
953 lineage specification and differentiation. *Nature* 476: 63-68.
- 954 87. Schmitt TM, Zuniga-Pflucker JC (2002) Induction of T cell development from hematopoietic  
955 progenitor cells by delta-like-1 in vitro. *Immunity* 17: 749-756.
- 956 88. Franco CB, Scripture-Adams DD, Proekt I, Taghon T, Weiss AH, et al. (2006) Notch/Delta signaling  
957 constrains reengineering of pro-T cells by PU.1. *Proc Natl Acad Sci U S A* 103: 11993-11998.
- 958 89. Del Real MM, Rothenberg EV (2013) Architecture of a lymphomyeloid developmental switch  
959 controlled by PU.1, Notch and Gata3. *Development* 140: 1207-1219.
- 960 90. Garcia-Ojeda ME, Klein Wolterink RG, Lemaitre F, Richard-Le Goff O, Hasan M, et al. (2013) GATA-3  
961 promotes T-cell specification by repressing B-cell potential in pro-T cells in mice. *Blood* 121:  
962 1749-1759.
- 963 91. Taghon T, Yui MA, Rothenberg EV (2007) Mast cell lineage diversion of T lineage precursors by the  
964 essential T cell transcription factor GATA-3. *Nat Immunol* 8: 845-855.
- 965 92. Yui MA, Feng N, Rothenberg EV (2010) Fine-scale staging of T cell lineage commitment in adult  
966 mouse thymus. *J Immunol* 185: 284-293.

- 967 93. Tydell CC, David-Fung ES, Moore JE, Rowen L, Taghon T, et al. (2007) Molecular dissection of  
968 prethymic progenitor entry into the T lymphocyte developmental pathway. *J Immunol* 179: 421-  
969 438.
- 970 94. Van de Walle I, De Smet G, De Smedt M, Vandekerckhove B, Leclercq G, et al. (2009) An early  
971 decrease in Notch activation is required for human TCR-alpha-beta lineage differentiation at the  
972 expense of TCR-gammadelta T cells. *Blood* 113: 2988-2998.
- 973 95. Weerkamp F, Luis TC, Naber BA, Koster EE, Jeannotte L, et al. (2006) Identification of Notch target  
974 genes in uncommitted T-cell progenitors: No direct induction of a T-cell specific gene program.  
975 *Leukemia* 20: 1967-1977.
- 976 96. Germar K, Dose M, Konstantinou T, Zhang J, Wang H, et al. (2011) T-cell factor 1 is a gatekeeper for  
977 T-cell specification in response to Notch signaling. *Proc Natl Acad Sci U S A* 108: 20060-20065.
- 978 97. Leddin M, Perrod C, Hoogenkamp M, Ghani S, Assi S, et al. (2011) Two distinct auto-regulatory loops  
979 operate at the PU.1 locus in B cells and myeloid cells. *Blood* 117: 2827-2838.
- 980 98. Oh P, Lobry C, Gao J, Tikhonova A, Loizou E, et al. (2013) In vivo mapping of notch pathway activity in  
981 normal and stress hematopoiesis. *Cell Stem Cell* 13: 190-204.
- 982 99. Zarnegar MA, Rothenberg EV (2012) Ikaros represses and activates PU.1 cell-type-specifically  
983 through the multifunctional Sfpi1 URE and a myeloid specific enhancer. *Oncogene* 31: 4647-  
984 4654.
- 985 100. Kueh HY, Yui MA, Ng KKH, Pease SS, Zhang JA, et al. (2016) Asynchronous combinatorial action of  
986 four regulatory factors activates Bcl11b for T cell commitment. *Nature immunology* 17: 956.
- 987 101. Ta CH, Nie Q, Hong T (2016) Controlling stochasticity in epithelial-mesenchymal transition through  
988 multiple intermediate cellular states. *Discrete & Continuous Dynamical Systems - Series B* 21.
- 989 102. Fu Y, Lim S, Urano D, Tunc-Ozdemir M, Phan NG, et al. (2014) Reciprocal encoding of signal  
990 intensity and duration in a glucose-sensing circuit. *Cell* 156: 1084-1095.

- 991 103. Li C, Wang J (2014) Landscape and flux reveal a new global view and physical quantification of  
992 mammalian cell cycle. *Proceedings of the National Academy of Sciences* 111: 14130-14135.
- 993 104. Zhang B, Wolynes PG (2014) Stem cell differentiation as a many-body problem. *Proceedings of the*  
994 *National Academy of Sciences* 111: 10185-10190.
- 995 105. Van Kampen NG (1992) *Stochastic processes in physics and chemistry*; Elsevier.
- 996 106. Hu G (1994) *Stochastic forces and nonlinear systems*. Shanghai: Shanghai Scientific and  
997 Technological Education Publishing House. 184 p.
- 998 107. Ren W, Vanden-Eijnden E (2004) Minimum action method for the study of rare events.  
999 *Communications on pure and applied mathematics* 57: 637-656.
- 1000 108. Freidlin M, Weber M (2004) Random perturbations of dynamical systems and diffusion processes  
1001 with conservation laws. *Probability theory and related fields* 128: 441-466.
- 1002

1003 **Supporting information**

1004

1005 **Text S1. Model equations, model reductions and evaluation procedure through optimization.**

1006 **Table S1. Ranges of parameter values for sampling 3-node networks.**

1007 **Table S2. Parameter values for models of 29 minimum motifs for 3-node networks.**

1008 **Table S3. Experimental evidence supporting the regulations in the early T cell development model.**

1009 **Table S4. Parameter values for early T cell development model.**

1010 **Figure S1. Phase planes for Type I minimum network topologies.** Nullclines for TF A (the node on the  
1011 left of the network diagram) and TF B (the node on the right of the network diagram) are shown. Stable  
1012 steady states are shown as black dots. The inset network diagram shows the corresponding network.  
1013 Random parameter sampling was used to obtain the parameter sets that allows the 4-attractor systems.

1014 **Figure S2. Phase planes for Type II minimum network topologies.** Nullclines for TF A (the node on the  
1015 left of the network diagram) and TF B (the node on the right of the network diagram) are shown. Stable  
1016 steady states are shown as black dots. Random parameter sampling was used to obtain the parameter  
1017 sets that allows the 4-attractor systems.

1018 **Figure S3. Overlaid four attractors for each of the 216 topologies from the 3-node network that**  
1019 **produce 4-attractor systems.** Factor A denotes the TF on the left of the network diagram. Factor B  
1020 denotes the TF on the right of the network diagram. In some topologies A and B are positively  
1021 correlated (left panel), whereas they are negatively correlated in other topologies (right panel). Colored  
1022 dots denote the stable steady states. Colored lines connect states of their corresponding topologies. The  
1023 colors of the cell states match the illustration in Figure 1. The colors of the lines denote different



1024 representative models. z-score is calculated by shifting the mean of each four attractors to 0 and then  
1025 normalizing the four data points to unit variance data. All models shown in this figure are built with  
1026 additive form of Hill functions.

1027 **Figure S4. Four-attractor systems generated with the alternative form of equations. A.** Overlaid four  
1028 attractors for each of the 216 topologies from the 3-node network that produce 4-attractor systems.  
1029 Factor A is the TF on the left of the network diagram. Factor B is the TF on the right of the network  
1030 diagram. In some topologies A and B are positively correlated (left panel), whereas they are negatively  
1031 correlated in other topologies (right panel). Colored dots denote the stable steady states. Colored lines  
1032 connect states of their corresponding topologies. The colors of the cell states match the illustration in  
1033 Figure 1. The colors of the lines denote different representative models. z-score is calculated by shifting  
1034 the mean of each four attractors to 0 and then normalizing the four data points to unit variance data. **B.**  
1035 Example phase planes for two minimum topologies (Type I and Type II respectively). In each case, four  
1036 out of the seven steady states (intersections denoted by solid dots) are stable. All models shown in this  
1037 figure are built with multiplicative form of Hill functions.

1038 **Figure S5. Overlaid four attractors for each of the 559 topologies from the T cell network that produce**  
1039 **4-attractor systems.** Colored dots denote the stable steady states. Colored lines connect states of their  
1040 corresponding topologies. The colors of the cell states match the illustration in Figure 1. The colors of  
1041 the lines denote different representative models. z-score is calculated by shifting the mean of each four  
1042 attractors to 0 and then normalizing the four data points to unit variance data. All models shown in this  
1043 figure are built with multiplicative form of Hill functions.

1044 **Figure S6. Comparison of three types of network topologies.** Histogram shows distributions of the  
1045 numbers of topologies from the entire complexity atlas (Figure 3C) over the space of parameter sets

1046 that generate the four-attractor systems per  $10^6$  random parameter sets. Distributions are separately  
1047 shown for three types of motifs. Red: Type I motif. Blue: Type II motif. Green: Hybrid motif.

1048 **Figure S7. Landscape and corresponding minimum action paths (MAPs) for the T cell developmental**  
1049 **network in the PU.1-BCL11B state space.** White solid lines represent the MAP from ETP state to DN2a,  
1050 DN2b, and DN3 states. Magenta solid lines represent the MAP from DN3 to DN2b, DN2a, and to ETP  
1051 state. Dashed lines represent the direct MAP from ETP to DN3 and from DN3 to ETP states, respectively.

1052 **Figure S8. Landscape and corresponding minimum action paths (MAPs) for the T cell developmental**  
1053 **network in the PU.1-GATA3 state space.** White solid lines represent the MAP from ETP state to DN2a,  
1054 DN2b, and DN3 states. Magenta solid lines represent the MAP from DN3 to DN2b, DN2a, and to ETP  
1055 state. Dashed lines represent the direct MAP from ETP to DN3 and from DN3 to ETP states, respectively.

1056 **Figure S9. Landscape changes as Notch signal increases.** As the Notch signal (N) increases, the  
1057 landscape change from a quadristable (four stable states coexist), to tristable (DN2a, DN2b and DN3), to  
1058 bistable (DN2b and DN3) and finally to a monostable DN3 state.

1059 **Figure S10. Quasi-energy landscape for the *Bcl11b* knockout condition.** With the *Bcl11b* knockout  
1060 ( $k_B=0$ ), the landscape changes from a quadristable (four stable states coexist), to a bistable (ETP and  
1061 DN2a) state.

1062 **Figure S11. Venn diagram of four types of network motifs that can produce four attractors with up to**  
1063 **three TFs.** Red and blue areas correspond to Type I and Type II motifs shown in Figure 2B. Green area  
1064 corresponds to motifs that contain both Type I and Type II networks. Orange area corresponds to motifs  
1065 that can only produce four unordered attractors, in which the concentrations of the TFs are non-  
1066 monotonically correlated. Numbers in the diagrams denote the total numbers of non-redundant  
1067 topologies for each type. The Type II (blue) and Hybrid (green) motifs can produce both ordered and  
1068 unordered 4-attractor systems, depending on the choice of parameters.

1069 **Figure S12. Enrichment motifs containing varying numbers of positive feedback loops similar to Type I**  
1070 **motif.** Top panel: total occurrences of various types of motifs in the T cell network. Middle panel:  
1071 empirical p-values (middle panel) for these motifs with a background network population. Bottom panel:  
1072 an illustration of the p-values with the distributions of the background population. Each motif has  $n$   
1073 ( $0 < n < 9$ ) positive feedback loops, all of which share at least one TFs in the motif. Type I motif is a  
1074 special case of such motifs with  $n = 3$ . Random networks were obtained by assigning random  
1075 regulations (positive, negative or none) between each pair of TFs.  $10^5$  random networks were generated.  
1076 Empirical p-values were obtained by counting the number of the random networks with the motifs not  
1077 less than those in the T cell network. See Methods for details of the p-value definition. Distributions of  
1078 motif frequencies obtained from the random networks are shown in the bottom panel. The yellow  
1079 vertical bars represent the number of occurrences in the T cell network. The right-tail areas defined by  
1080 the vertical bars correspond to the p-values shown in the middle panel (blue bars).

1081

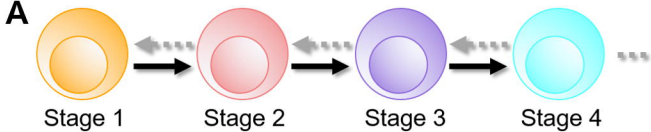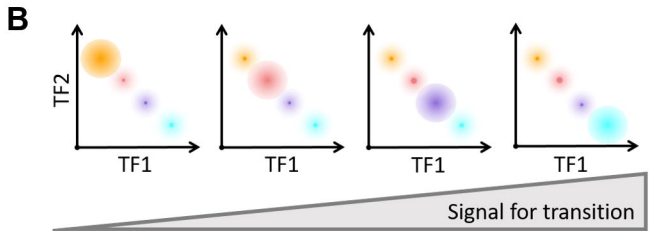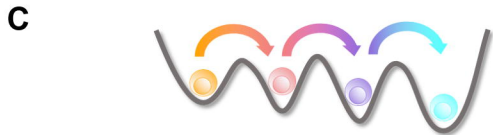

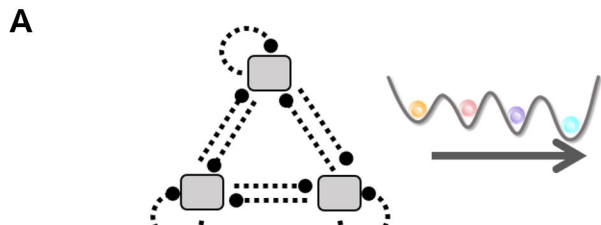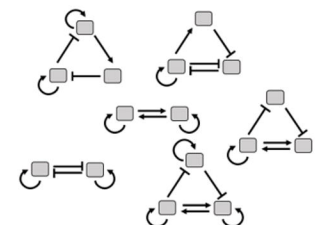

bioRxiv preprint doi: <https://doi.org/10.1101/453522>; this version posted October 25, 2018. The copyright holder for this preprint (which was not certified by peer review) is the author/funder. All rights reserved. No reuse allowed without permission.

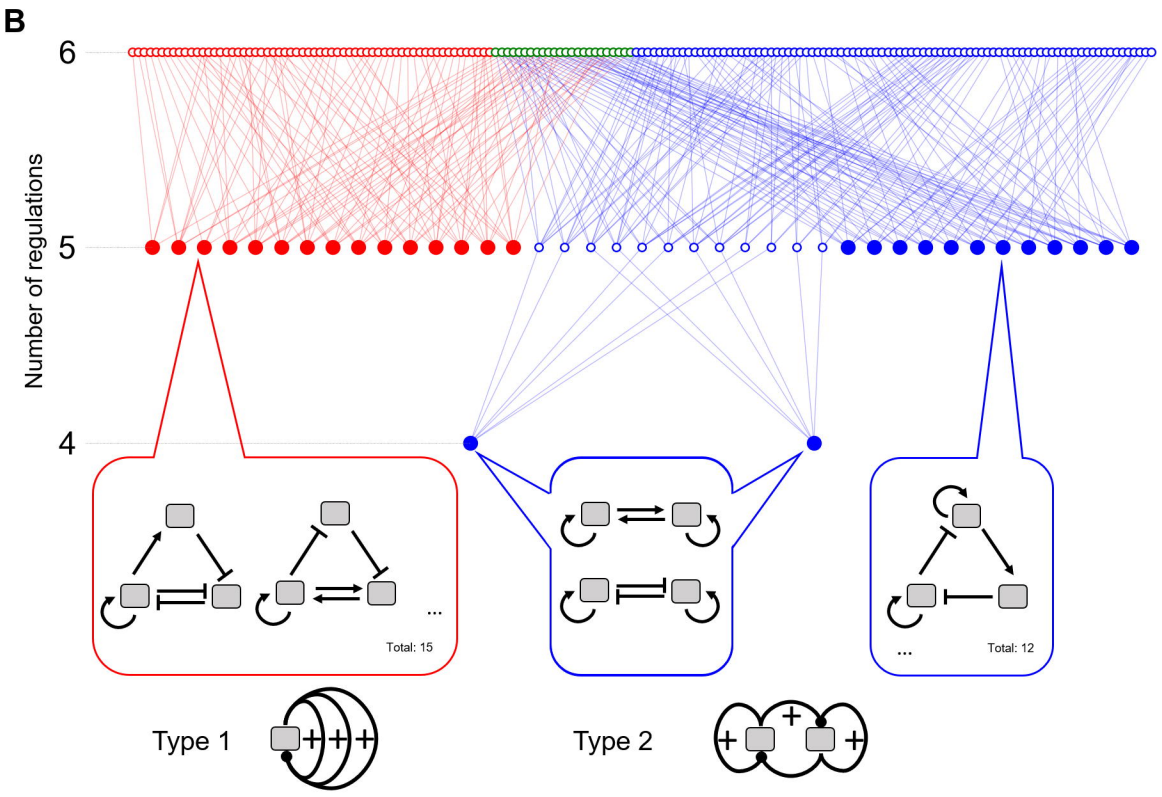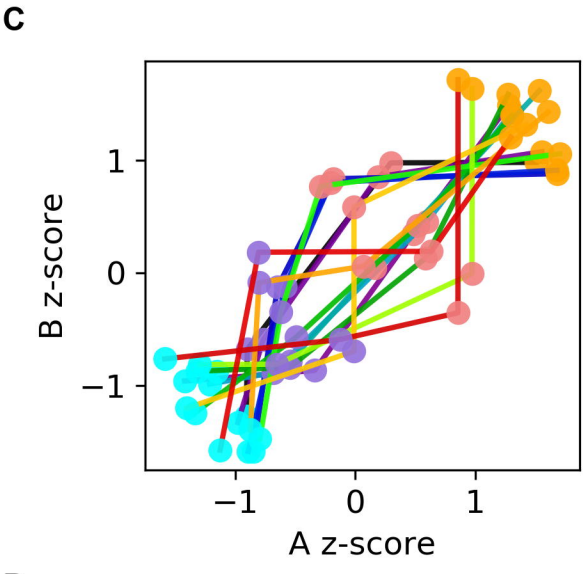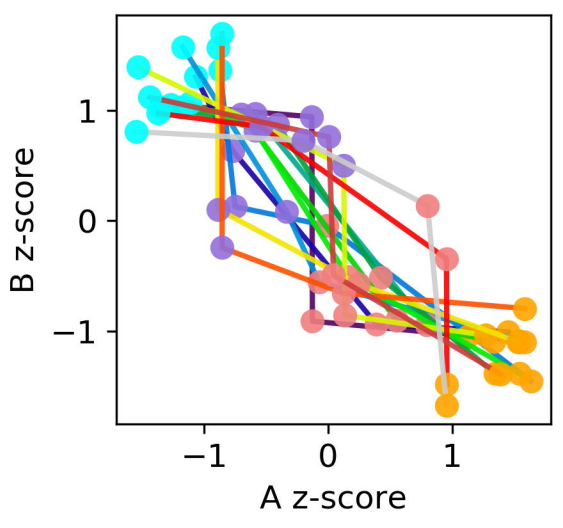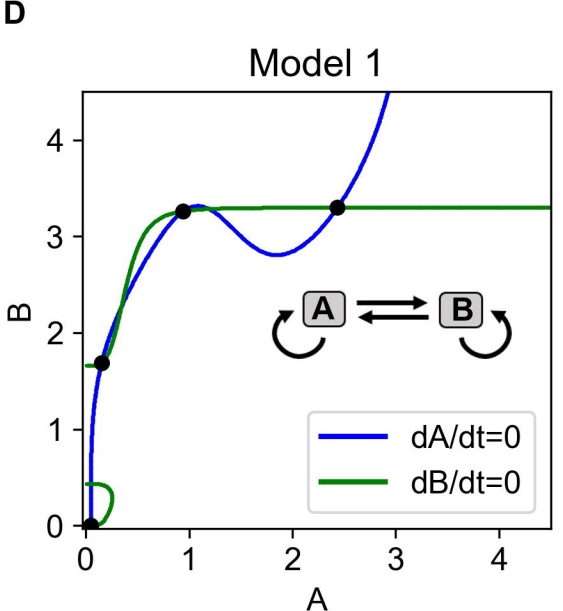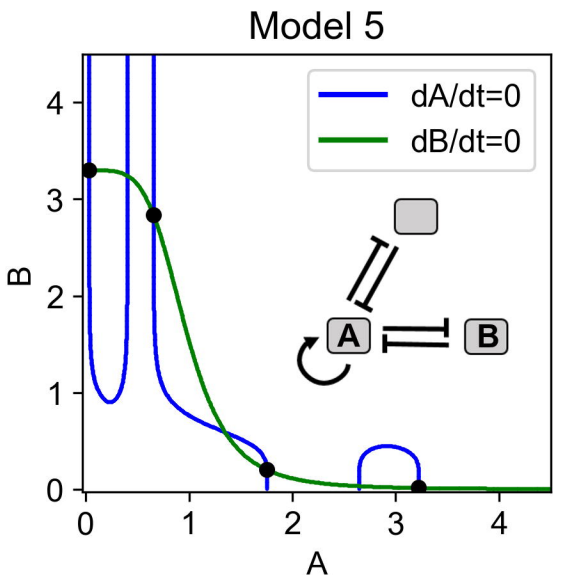

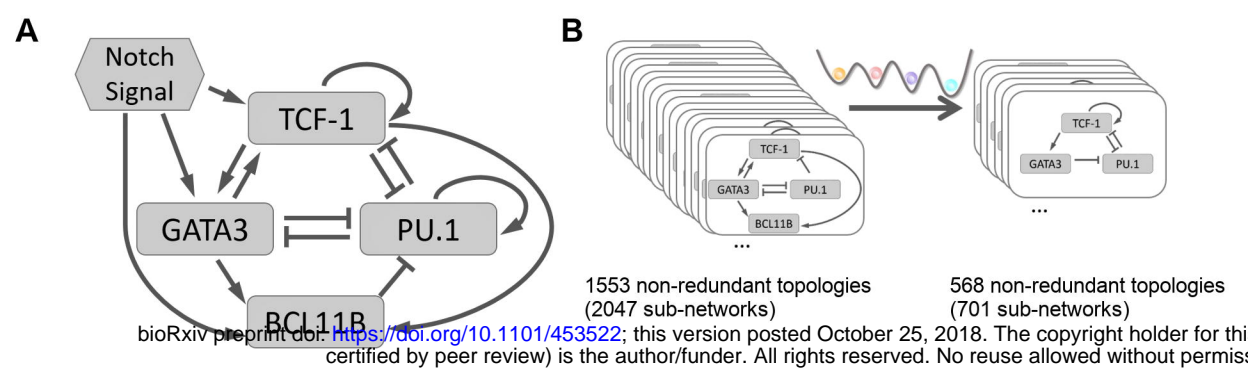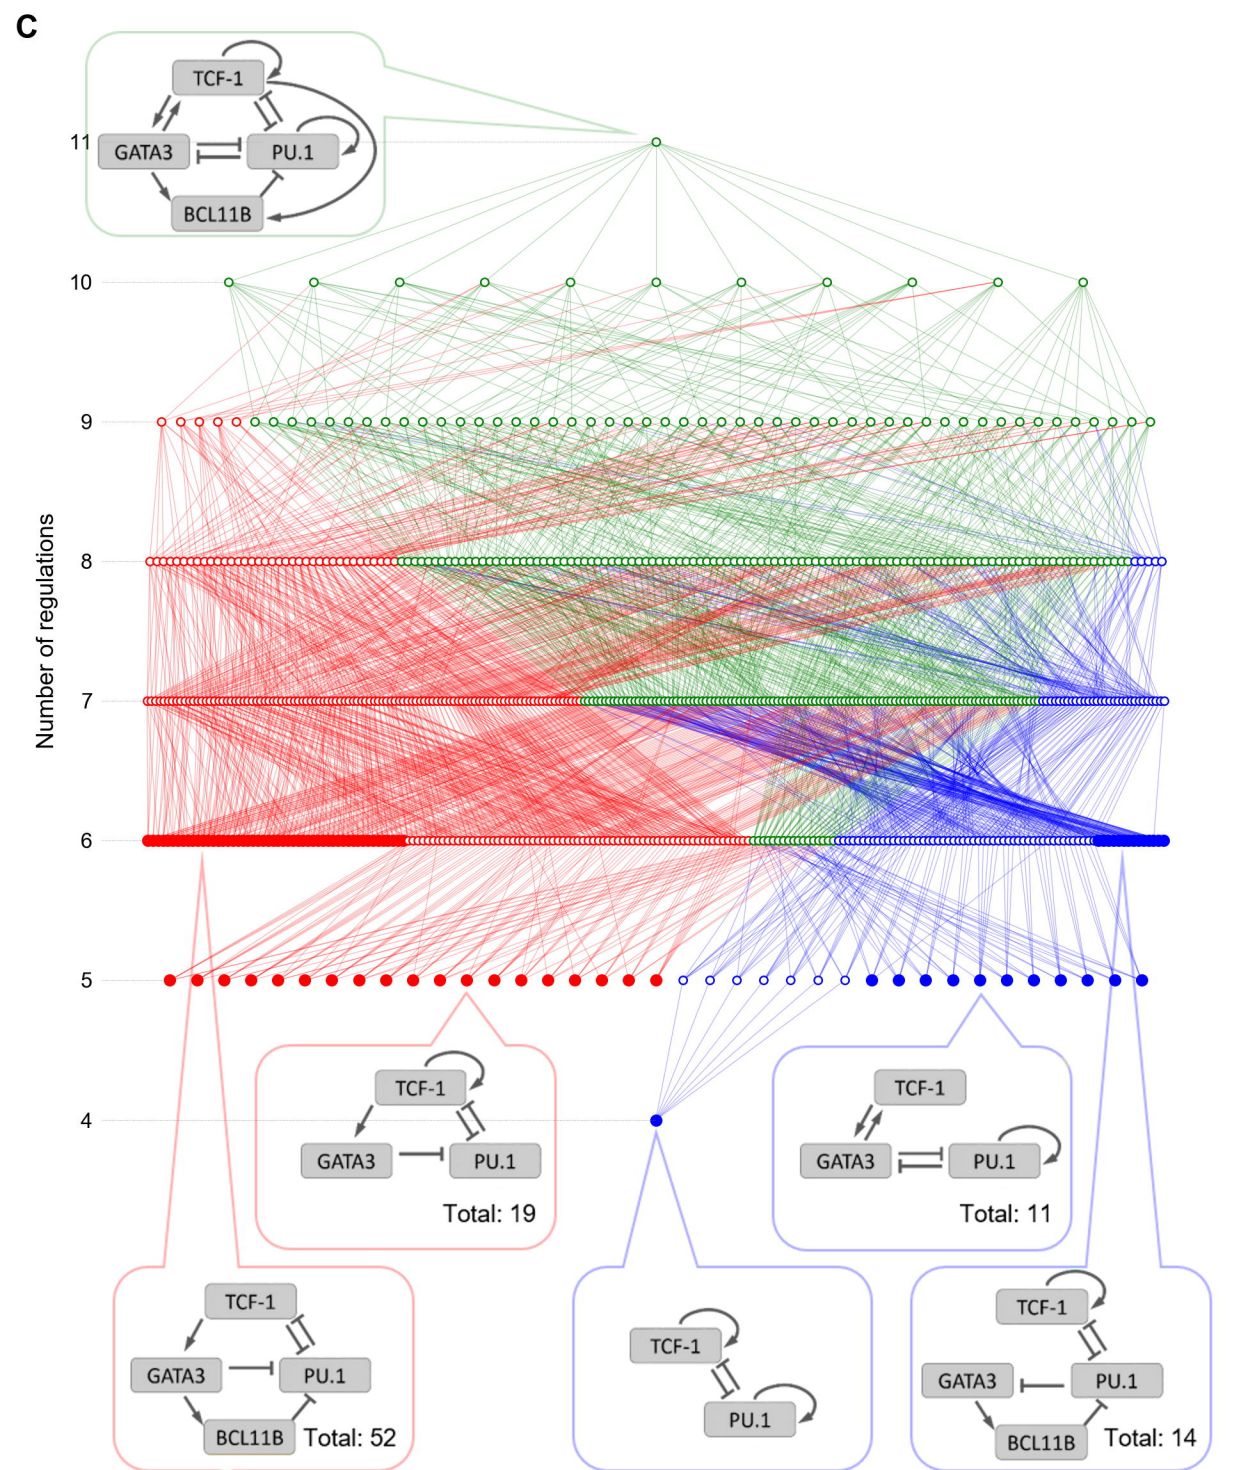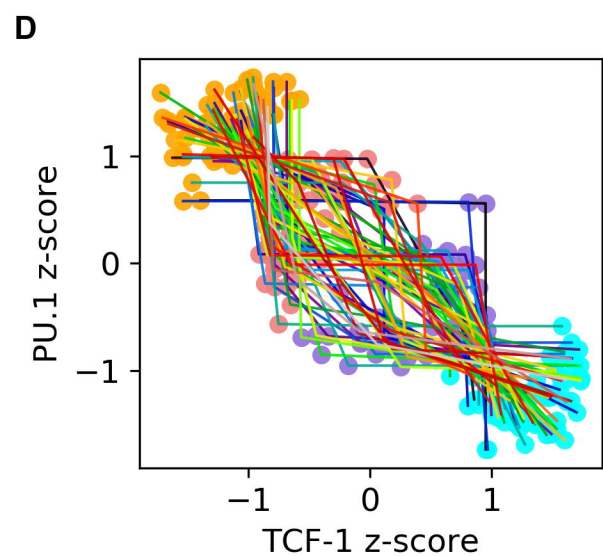

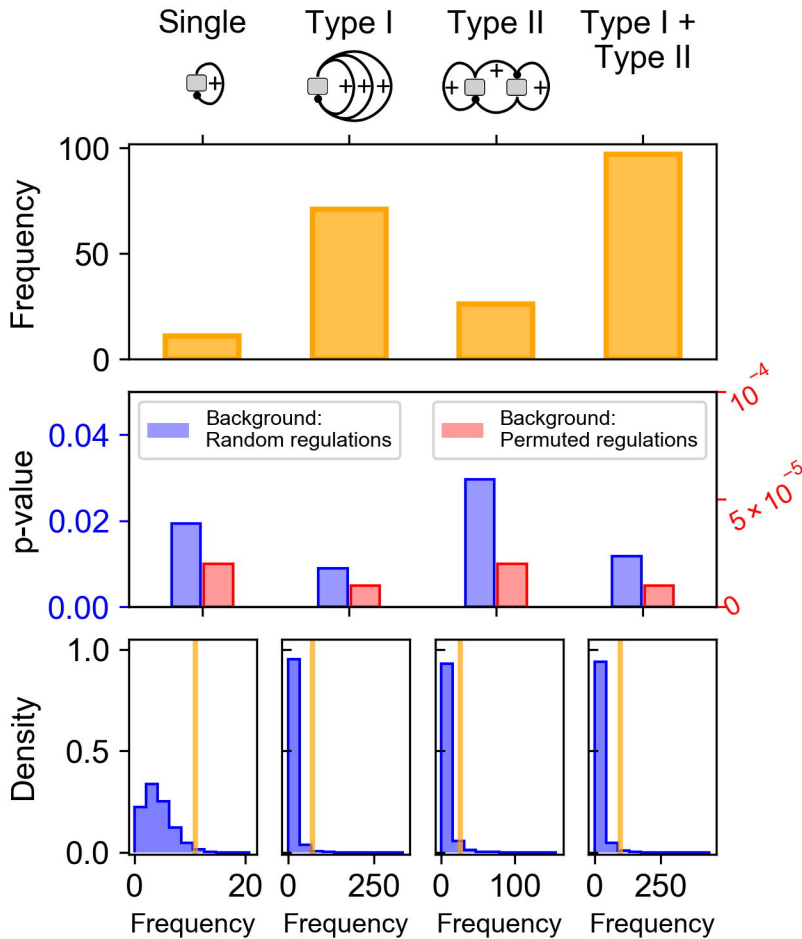

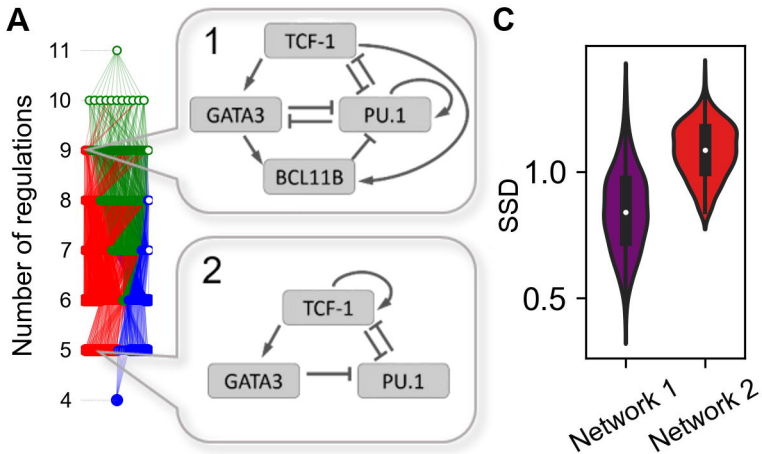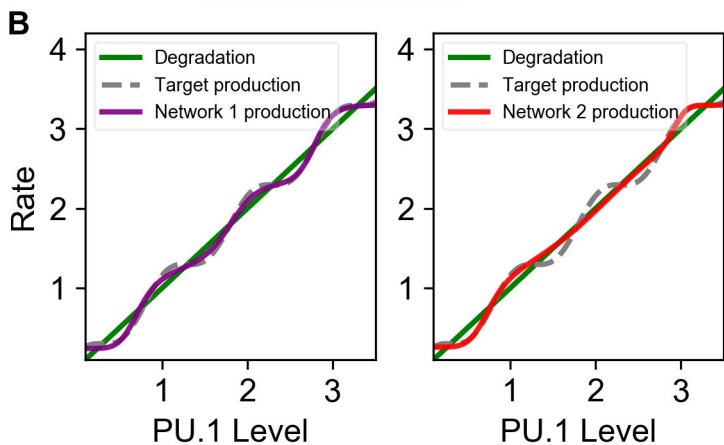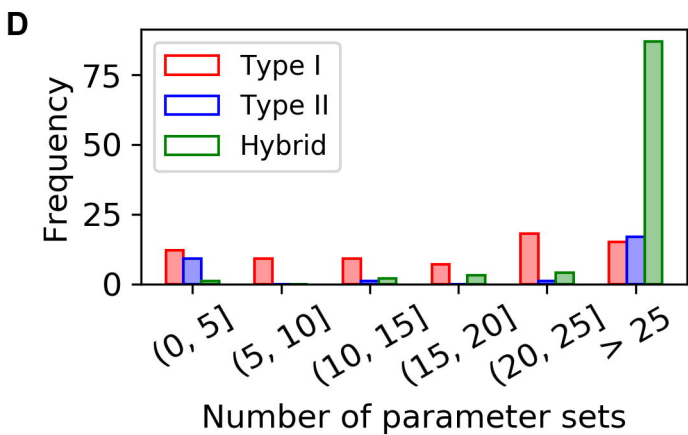



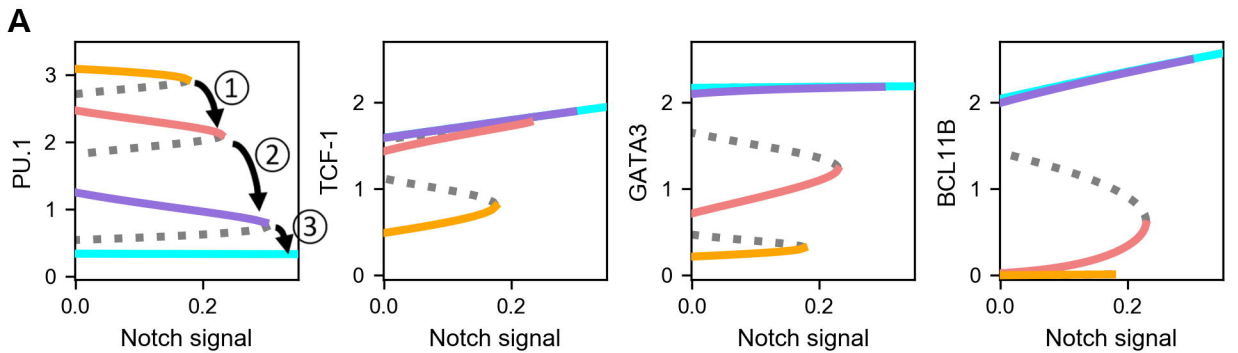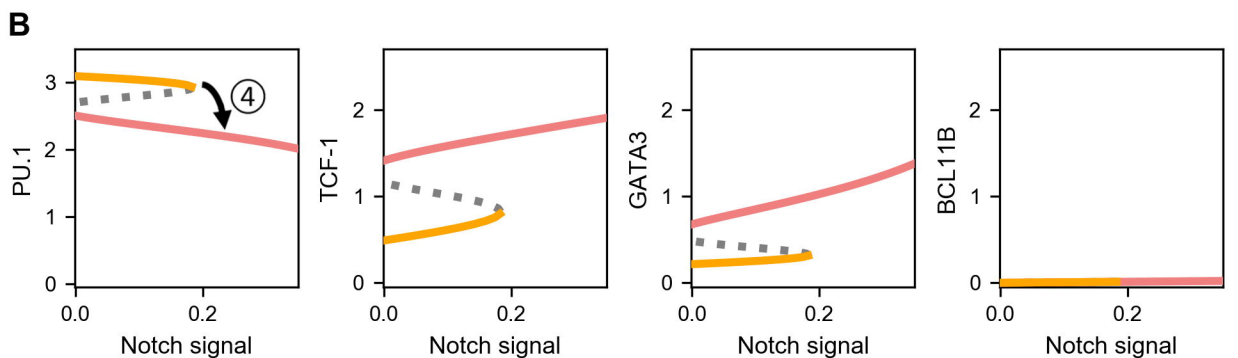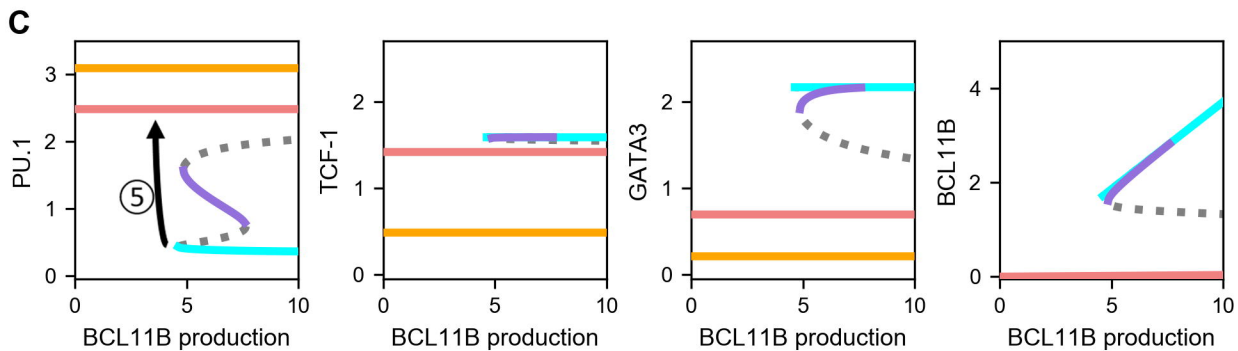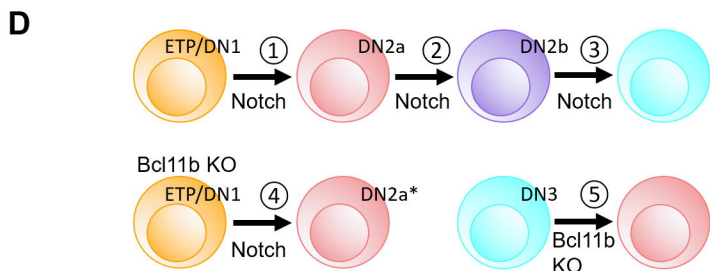

**A**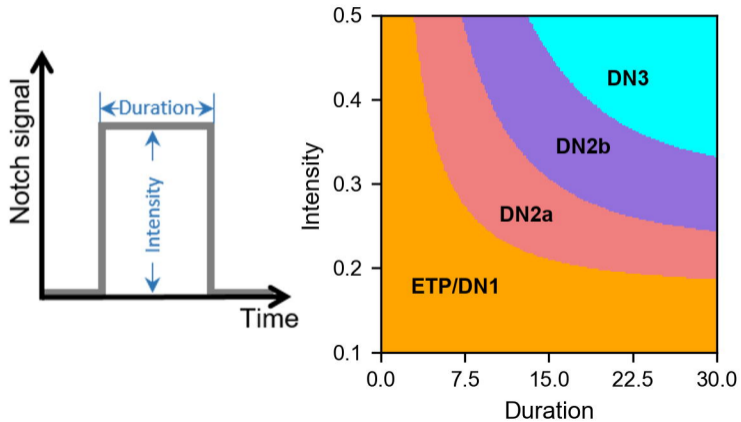**B**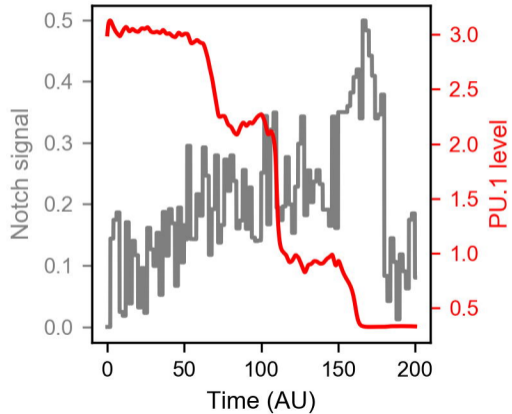

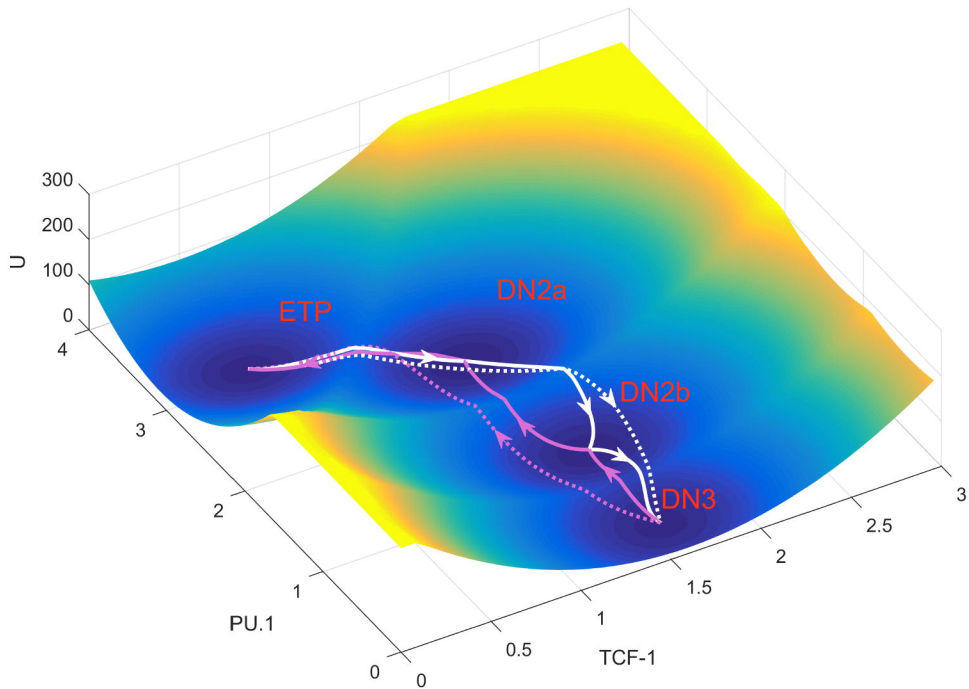

**A**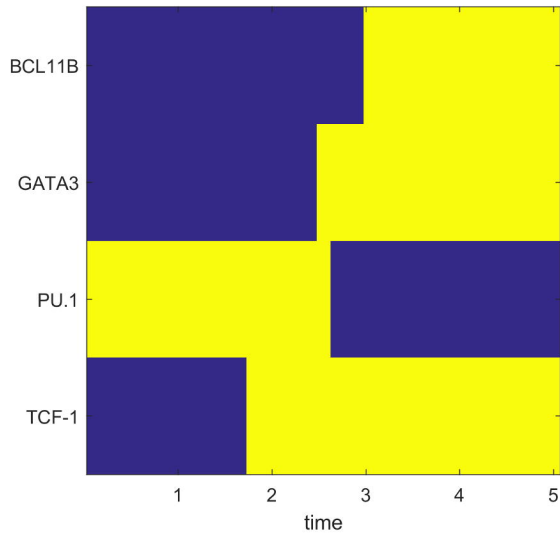**B**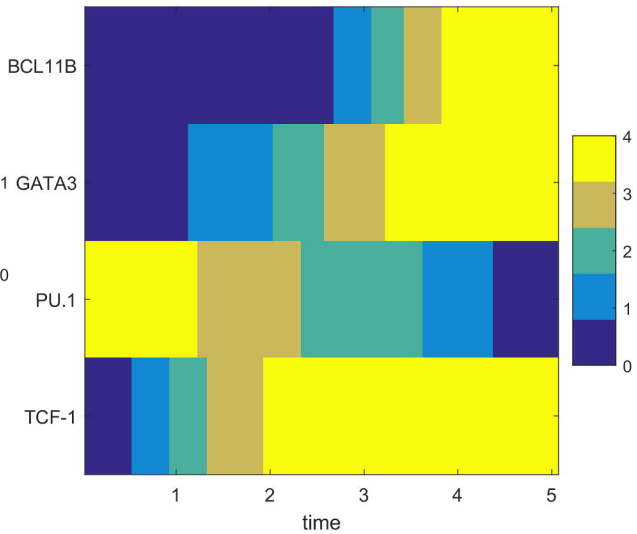

**A**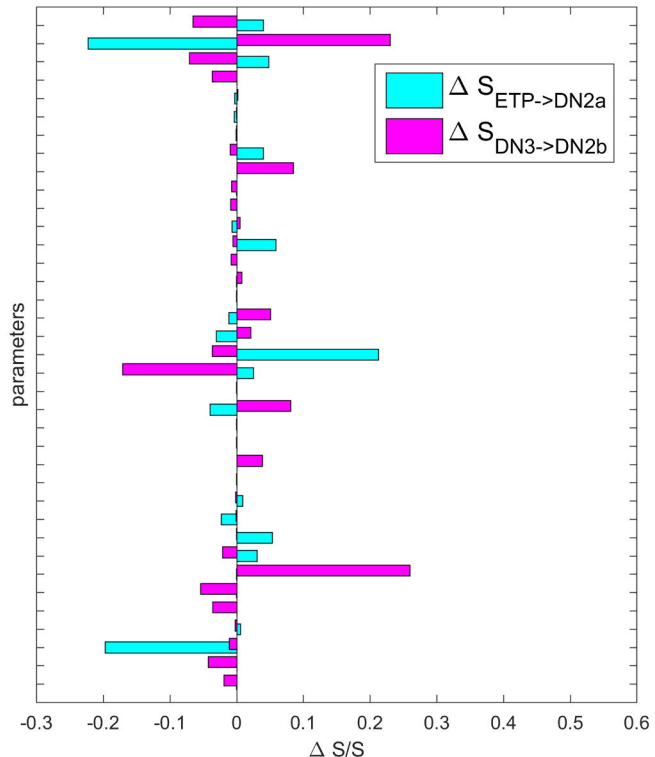**B**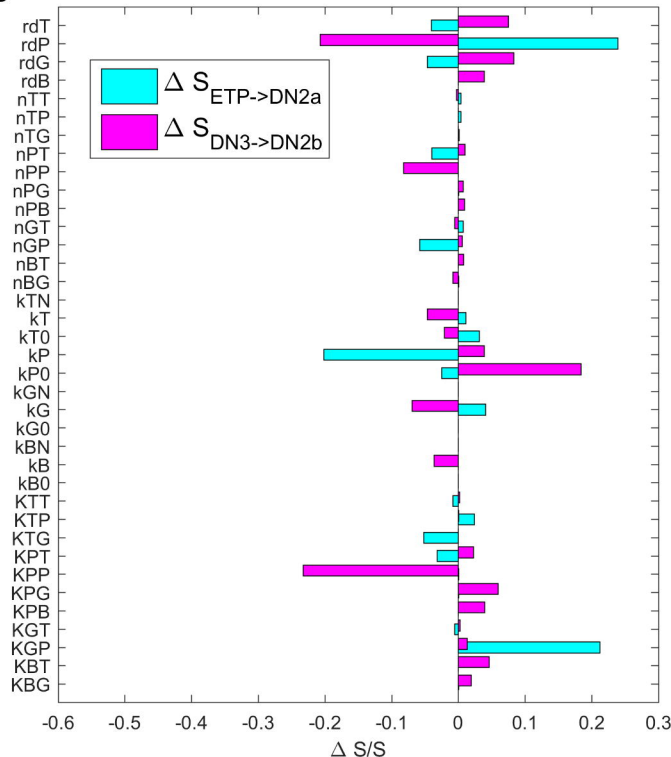

Source: http://biorxiv.org/content/10.1101/453522v1.full.pdf
